# Supplementary material for: Inferring Multi-Organ Genetic Causal Connections using Imaging and Clinical Data through Mendelian Randomization
Source: bioRxiv or medRxiv preprint supplement (doi:10.1101/2023.05.22.23290355), 2024-05-06
Supplement: Supplementary file [file media-1.pdf]

## Supplementary Information for

### **Multi-organ genetic causal connections inferred from imaging and clinical data through Mendelian randomization**

5

#### **This PDF file includes:**

Supplementary Note  
Supplementary Figures Figs. S1-S25.  
Legends for Tables S1 to S6

10

#### **Other Supplementary Materials for this manuscript include the following:**

Tables S1 to S6 (.xlsx) (available in a zip file)

15

## Supplementary Note

### Heritability of multi-organ imaging biomarkers

It has been shown that the CMR and brain MRI exists certain heritability by many twin and family studies<sup>1-3</sup>. However, the level of heritability might differ with respect to different heart or brain regions. For example, large brain volumes and cortical regions involved in language, executive function, and emotional regulations are usually consistently high in heritability<sup>1,4</sup>. Most of the brain structural MRI traits has relatively strong heritability, ranging from 0.6 to 0.8<sup>4</sup> compared with 0.2 to 0.6 heritability of brain functional connectivity<sup>5</sup>. Cardiac MRI traits are also heritable<sup>6</sup>, such as ascending aortic<sup>7</sup> and left ventricular structure<sup>8</sup>. The heritability of all abdominal IDPs is significant, which suggests that genetic differences account for a substantial portion of the variation among individuals. The inclusion of height and BMI as additional covariates has minimal impact on heritability. More detailed information about abdominal IDPs can be found in Liu, et al.<sup>9</sup>. All skeletal proportions are highly heritable (0.4-0.5) and the range in twin studies is between 0.4 and 0.8<sup>10</sup>.

## References

1. Schmitt, J.E., *et al.* Review of twin and family studies on neuroanatomic phenotypes and typical neurodevelopment. *Twin Res Hum Genet* **10**, 683-694 (2007).
2. Batouli, S.A., Trollor, J.N., Wen, W. & Sachdev, P.S. The heritability of volumes of brain structures and its relationship to age: a review of twin and family studies. *Ageing Res Rev* **13**, 1-9 (2014).
3. Lopes, M.C., Andrew, T., Carbonaro, F., Spector, T.D. & Hammond, C.J. Estimating heritability and shared environmental effects for refractive error in twin and family studies. *Invest Ophthalmol Vis Sci* **50**, 126-131 (2009).
4. Jansen, A.G., Mous, S.E., White, T., Posthuma, D. & Polderman, T.J. What twin studies tell us about the heritability of brain development, morphology, and function: a review. *Neuropsychol Rev* **25**, 27-46 (2015).
5. Foo, H., *et al.* Genetic influence on ageing-related changes in resting-state brain functional networks in healthy adults: A systematic review. *Neurosci Biobehav Rev* **113**, 98-110 (2020).
6. Pirruccello, J.P., *et al.* Analysis of cardiac magnetic resonance imaging in 36,000 individuals yields genetic insights into dilated cardiomyopathy. *Nat Commun* **11**, 2254 (2020).
7. Tcheandjieu, C., *et al.* High heritability of ascending aortic diameter and trans-ancestry prediction of thoracic aortic disease. *Nat Genet* **54**, 772-782 (2022).
8. Jin, Y., *et al.* Heritability of left ventricular structure and function in Caucasian families. *Eur J Echocardiogr* **12**, 326-332 (2011).
9. Liu, Y., *et al.* Genetic architecture of 11 organ traits derived from abdominal MRI using deep learning. *Elife* **10**, e65554 (2021).
10. Chatterjee, S., Das, N. & Chatterjee, P. The estimation of the heritability of anthropometric measurements. *Applied Human Science* **18**, 1-7 (1999).

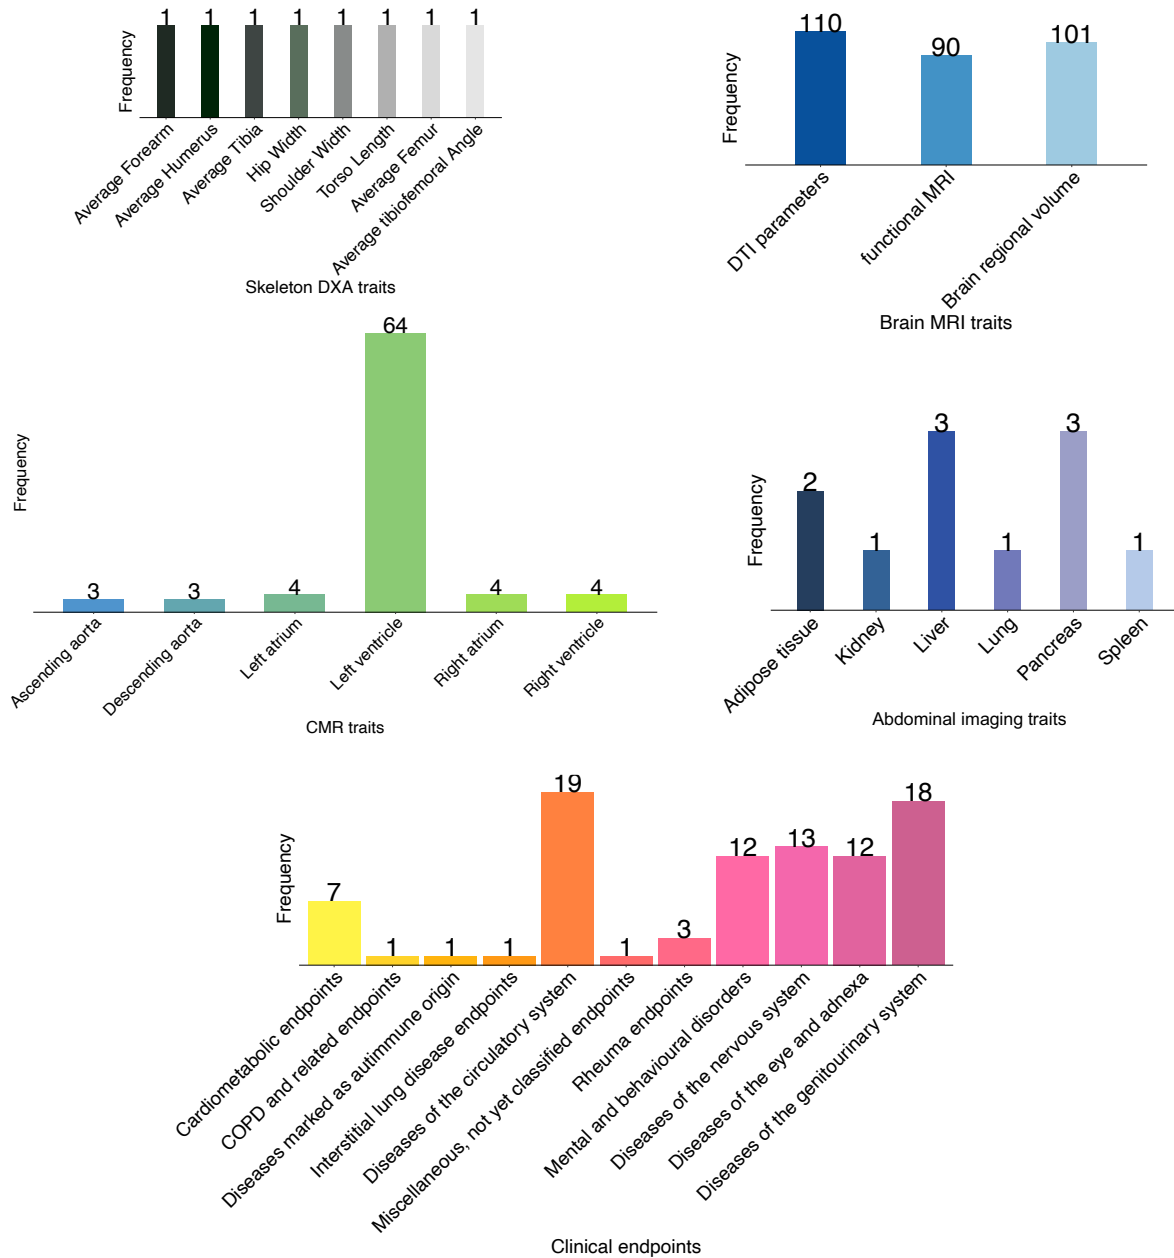

**Fig. S1 Frequency of imaging traits and clinical endpoints.** See Table S1 for the frequency of the imaging traits and clinical endpoints. Skeleton imaging traits include 6 DXA traits, which measure the length or width of human long bones. Brain imaging traits include three modalities, namely 110 DIT parameters, 90 network-level phenotypes from functional MRI, and 101 regional brain volumes. Heart imaging traits include 3 from AAO, 3 from DAO, 4 from the LA, 64 from the LV, 4 from the RA, and from 4 the RV. Abdominal traits measure the percent fat or iron content of different organs or tissues, such as adipose, kidney, liver, lung, pancreas, and spleen. Clinical outcomes include selected phenotypes from the Finngen database covering 11 categories.

5

10

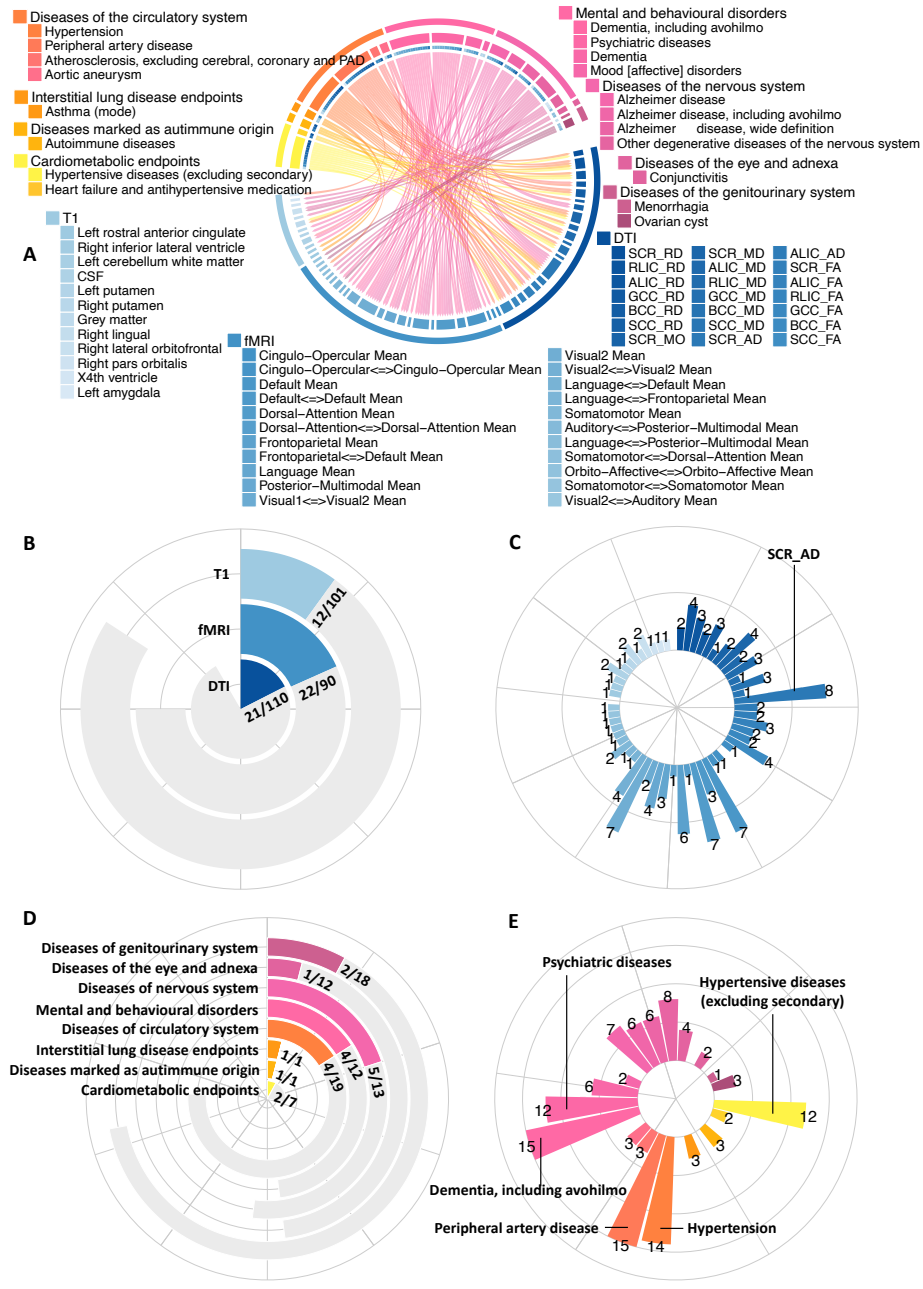

**Fig. S2 Mendelian Randomization when clinical endpoints are exposure and brain imaging traits are the outcome. (A)** The causal effect of clinical outcomes on brain imaging traits. The chord plot displays the connection between each causal pair. The first level (out) circle indicates each disease category or brain modality. The second level (middle) circle indicates the specific diseases within each disease category or fMRI/regional brain volume/DTI parameters within each brain modality. The third level circle on the brain feature side indicates which diseases the brain feature links to. The abbreviations in the legend can be found in **Table S1. (B)(D)** The circle bar plot showed the number of unique brain imaging traits and clinical outcomes that were significant in the results by category. **(C)(E)** The circle bar plot showed the frequency of each brain imaging trait and disease by category. The legend color can be found in **(A)**.

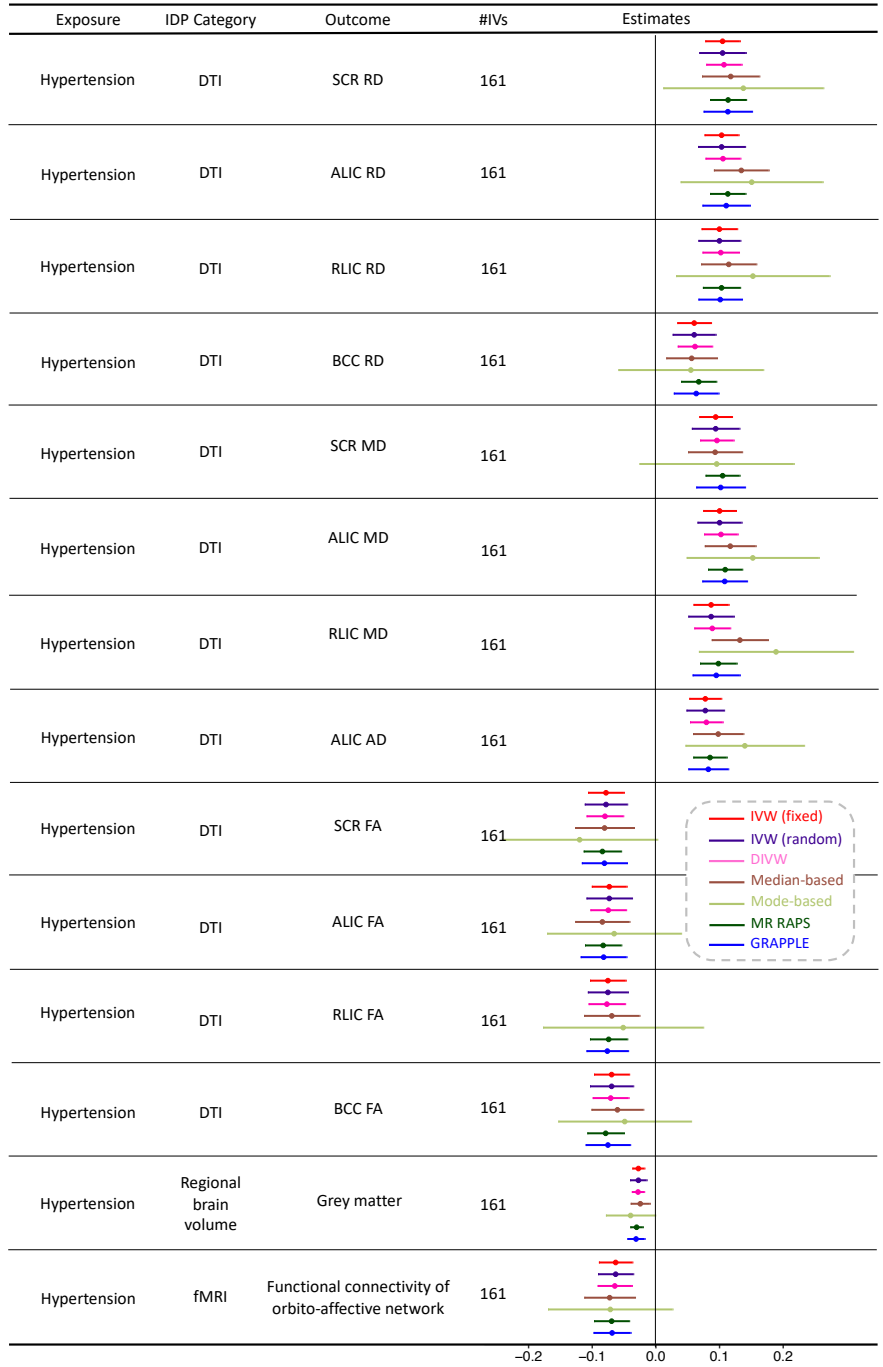

**Fig. S3 Genetic causal effects of hypertension on brain imaging biomarkers.** We illustrated selected significant ( $P < 5.18 \times 10^{-6}$ ) causal genetic links from hypertension (Exposure) to brain imaging biomarkers (Outcome) after adjusting for multiple testing using the Bonferroni procedure. IDP Category, category of brain imaging biomarkers; #IVs, the number of genetic variants used as instrumental variables. Different MR methods and their regression coefficients are labeled with different colors. See **Table S1** for the data resource of hypertension and **Table S2** for data resources of imaging biomarkers.

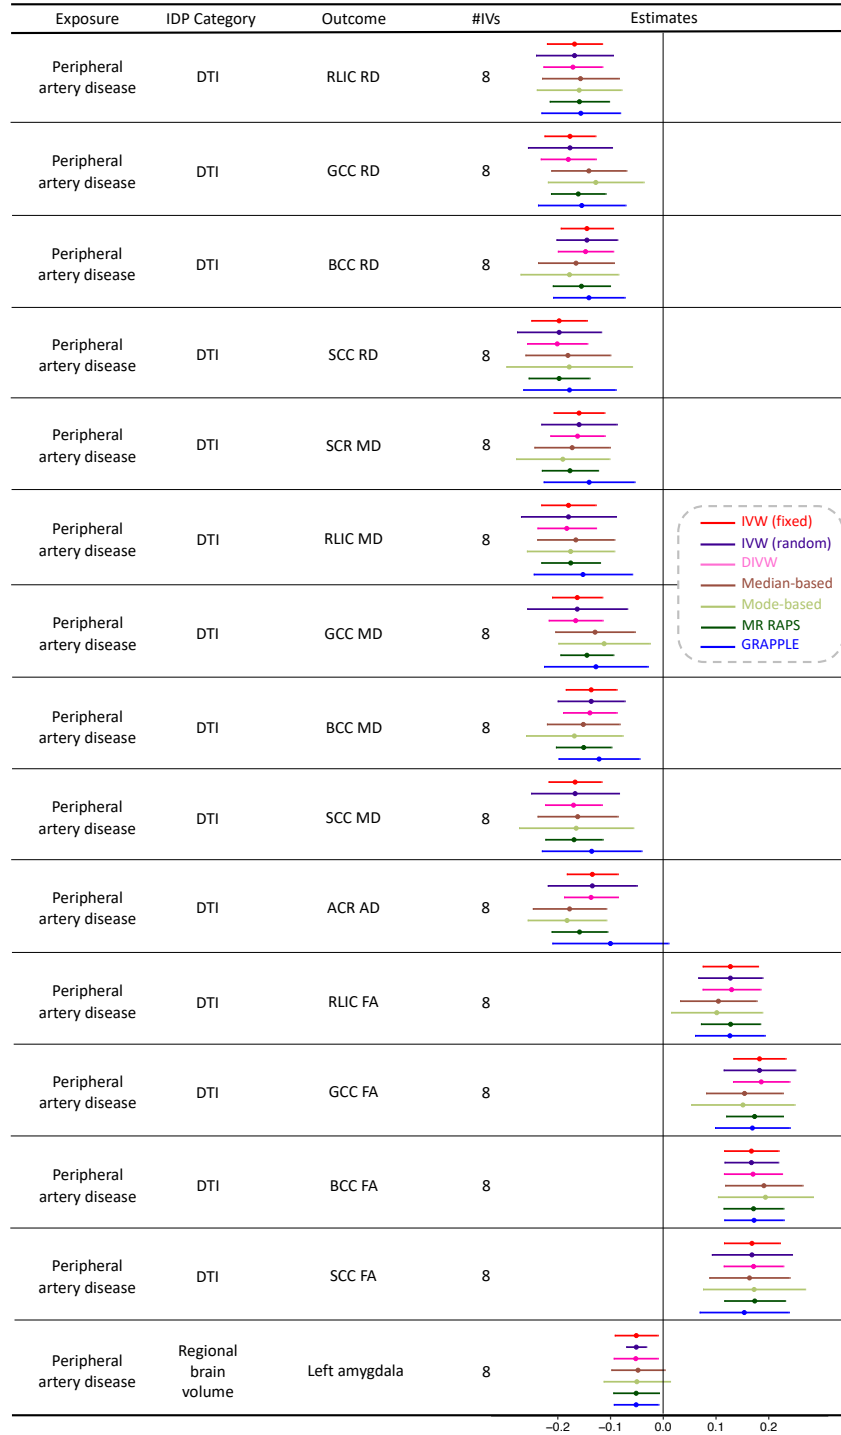

**Fig. S4 Genetic causal effects of peripheral artery diseases (PAD) on brain imaging biomarkers.**

We illustrated selected significant ( $P < 5.18 \times 10^{-6}$ ) causal genetic links from PAD (Exposure) to brain imaging biomarkers (Outcome) after adjusting for multiple testing using the Bonferroni procedure. IDP Category, category of brain imaging biomarkers; #IVs, the number of genetic variants used as instrumental variables. Different MR methods and their regression coefficients are labeled with different colors. See **Table S1** for the data resource of PAD and **Table S2** for data resources of imaging biomarkers.

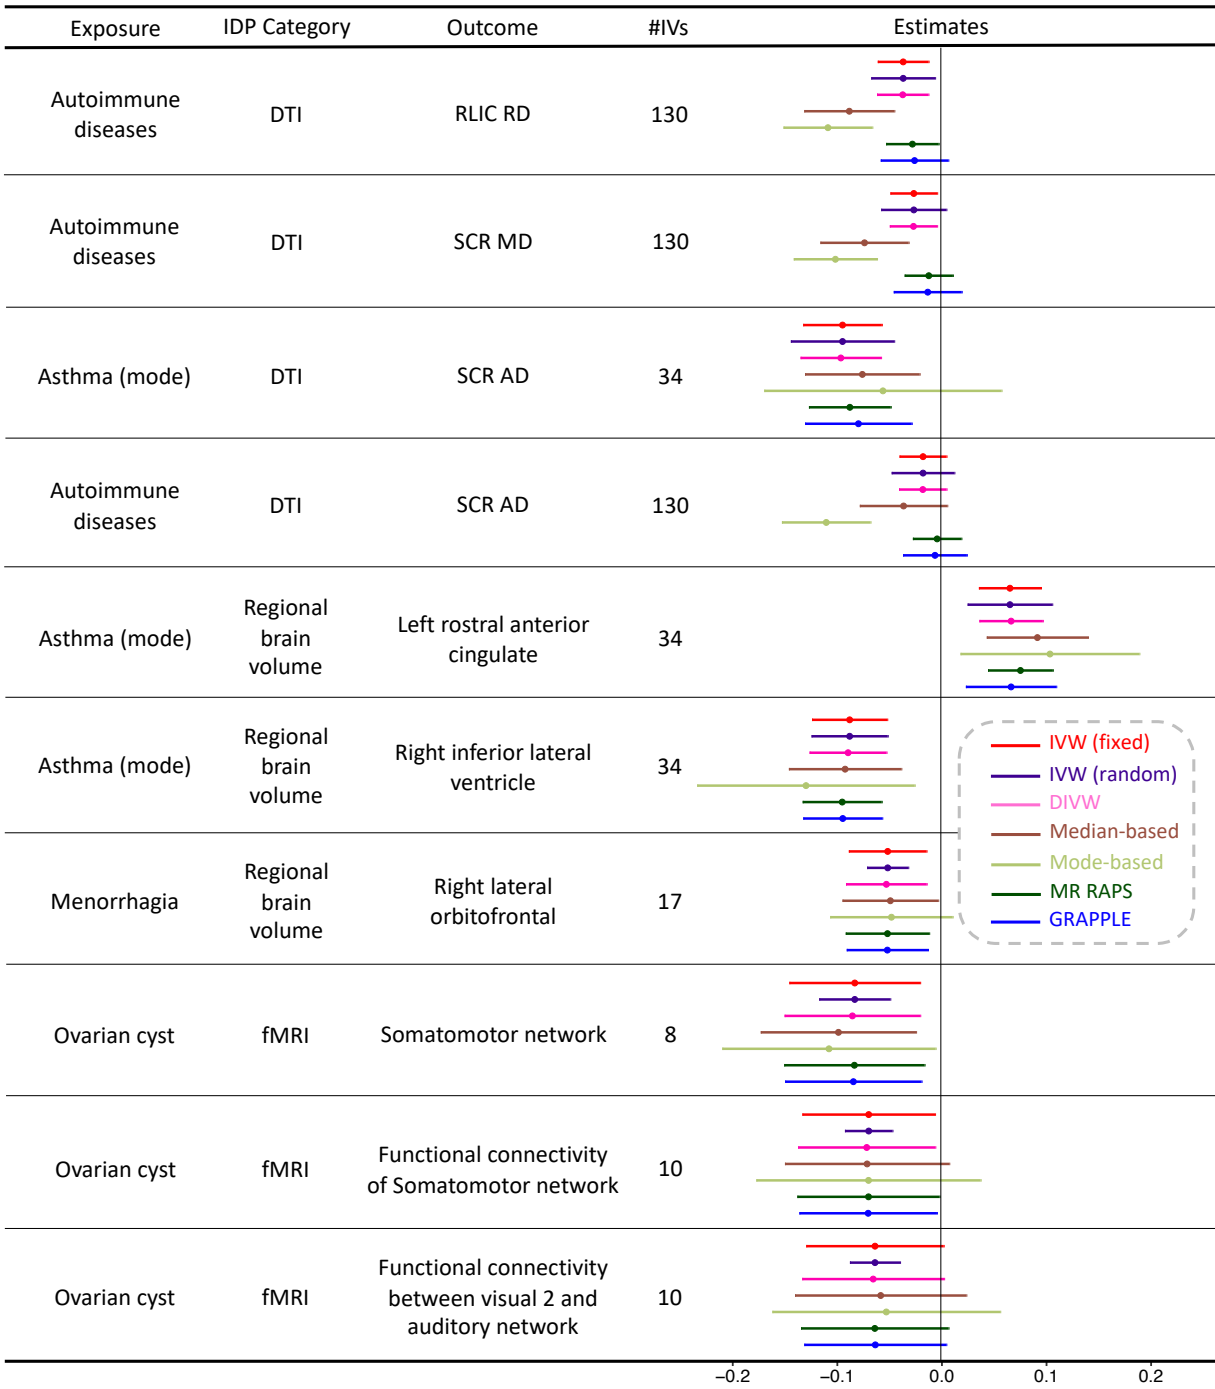

**Fig. S5 Genetic causal effects of other diseases on brain imaging biomarkers.** We illustrated selected significant ( $P < 5.18 \times 10^{-6}$ ) causal genetic links from non-brain/heart diseases (Exposure) to brain imaging biomarkers (Outcome) after adjusting for multiple testing using the Bonferroni procedure. IDP Category, category of brain imaging biomarkers; #IVs, the number of genetic variants used as instrumental variables. Different MR methods and their regression coefficients are labeled with different colors. See **Table S1** for the data resource of clinical outcomes and **Table S2** for data resources of imaging biomarkers.

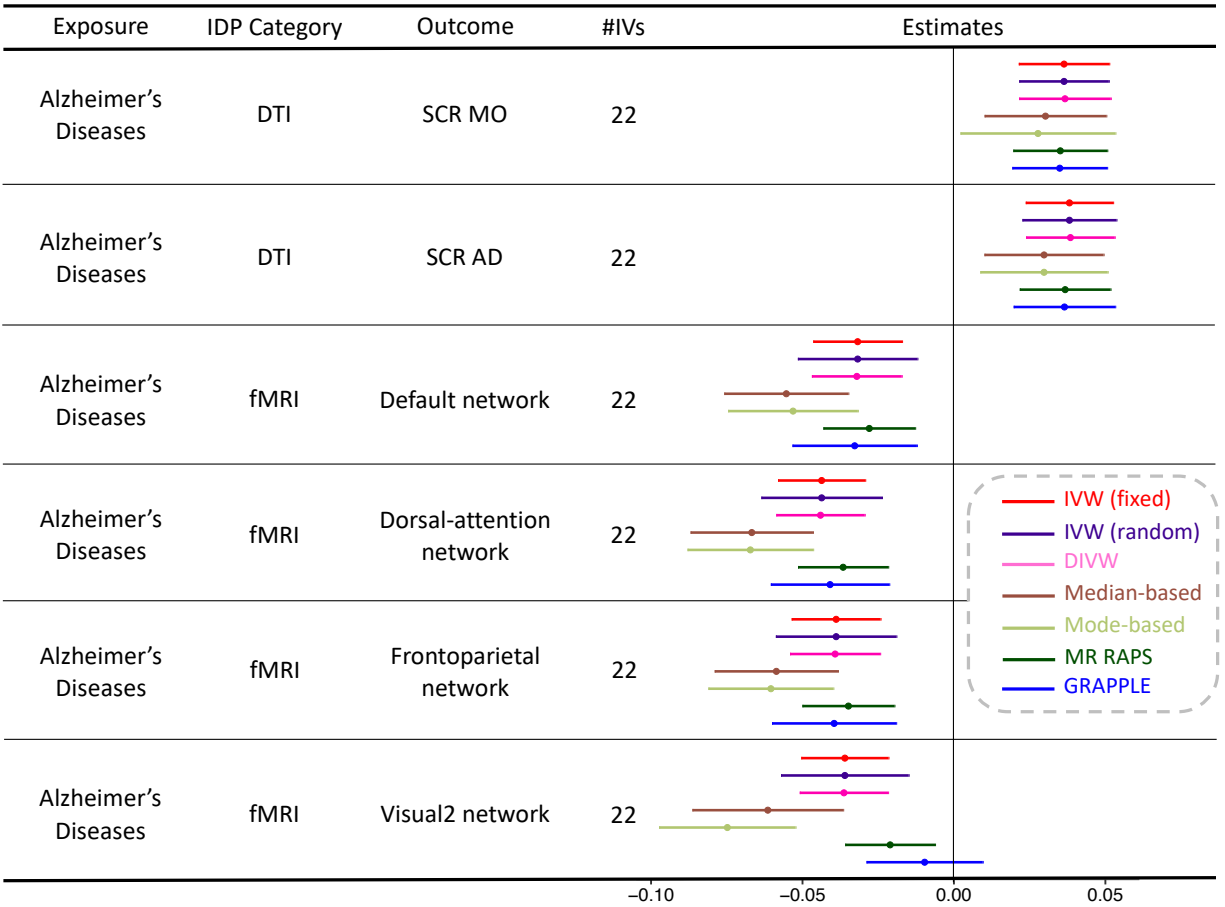

**Fig. S6 Genetic causal effects of Alzheimer's disease on brain imaging biomarkers.** We illustrated selected significant ( $P < 5.18 \times 10^{-6}$ ) causal genetic links from Alzheimer's diseases (Exposure) to brain imaging biomarkers (Outcome) after adjusting for multiple testing using the Bonferroni procedure. IDP Category, category of brain imaging biomarkers; #IVs, the number of genetic variants used as instrumental variables. Different MR methods and their regression coefficients are labeled with different colors. See **Table S1** for the data resource of Alzheimer's disease and **Table S2** for data resources of imaging biomarkers.



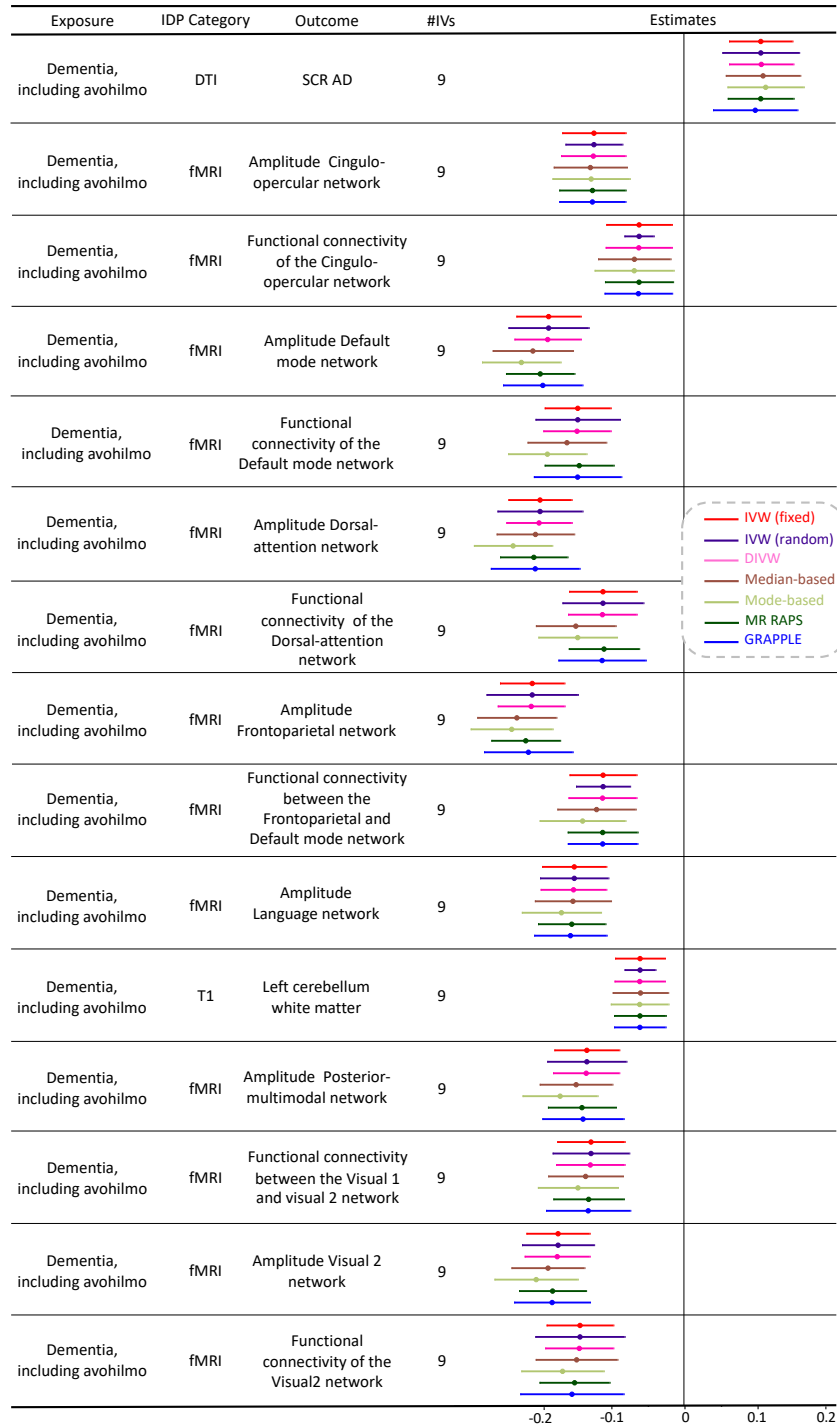

**Fig. S7 Genetic causal effects of dementia on brain imaging biomarkers.** We illustrated selected significant ( $P < 5.18 \times 10^{-6}$ ) causal genetic links from dementia (Exposure) to brain imaging biomarkers (Outcome) after adjusting for multiple testing using the Bonferroni. IDP Category, category of brain imaging traits; #IVs, the number of genetic variants used as instrumental variables. Different MR methods and their regression coefficients are labeled with different colors. See **Table S1** for data resources of dementia and **Table S2** for data resources of brain imaging biomarkers.

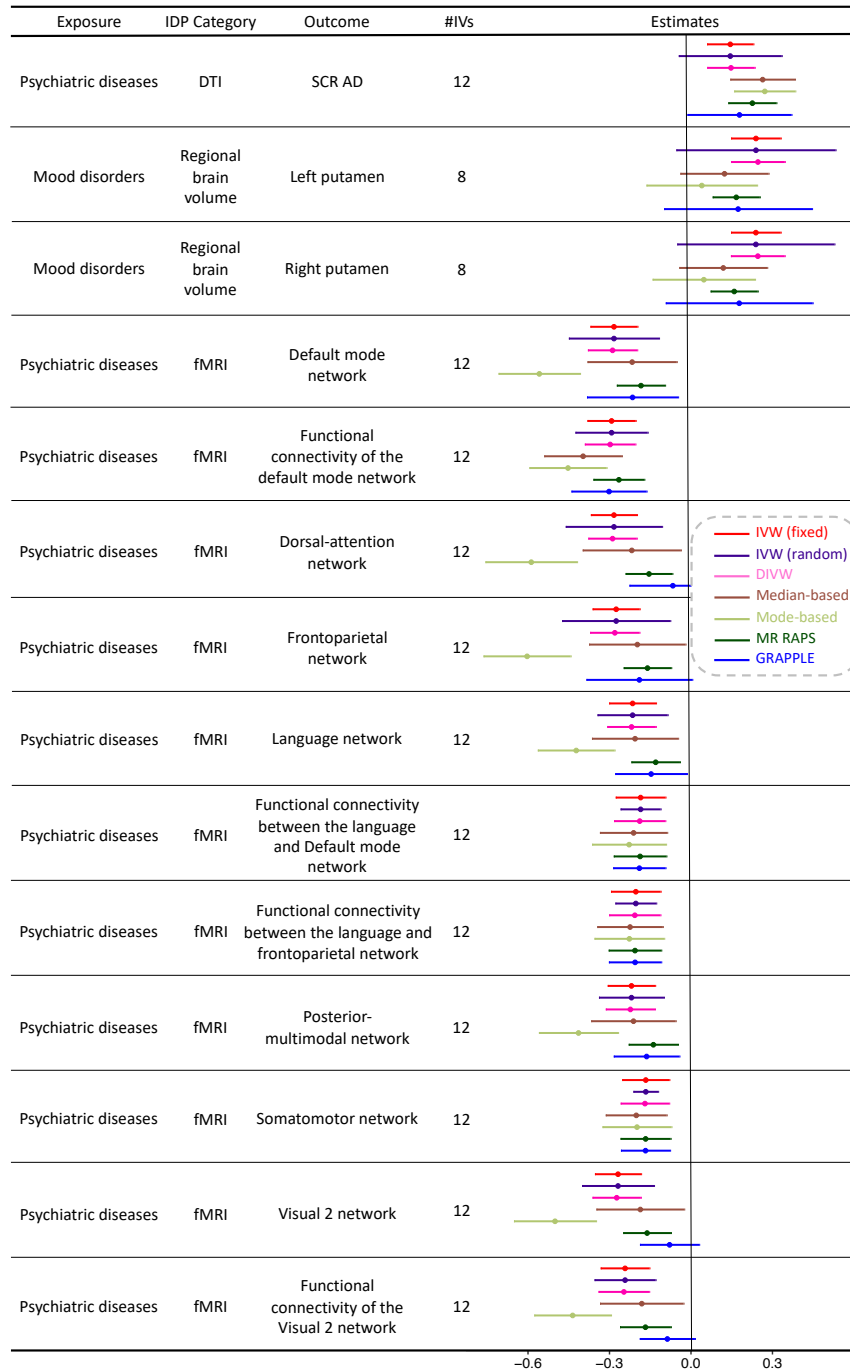

**Fig. S8 Genetic causal effects of psychiatric diseases on brain imaging biomarkers.** We illustrated selected significant ( $P < 5.18 \times 10^{-6}$ ) causal genetic links from psychiatric diseases (Exposure) to brain imaging biomarkers (Outcome) after adjusting for multiple testing using the Bonferroni procedure. IDP Category, category of brain imaging biomarkers; #IVs, the number of genetic variants used as instrumental variables. Different MR methods and their regression coefficients are labeled with different colors. See **Table S1** for the data resource of psychiatric diseases and **Table S2** for data resources of imaging biomarkers.

5

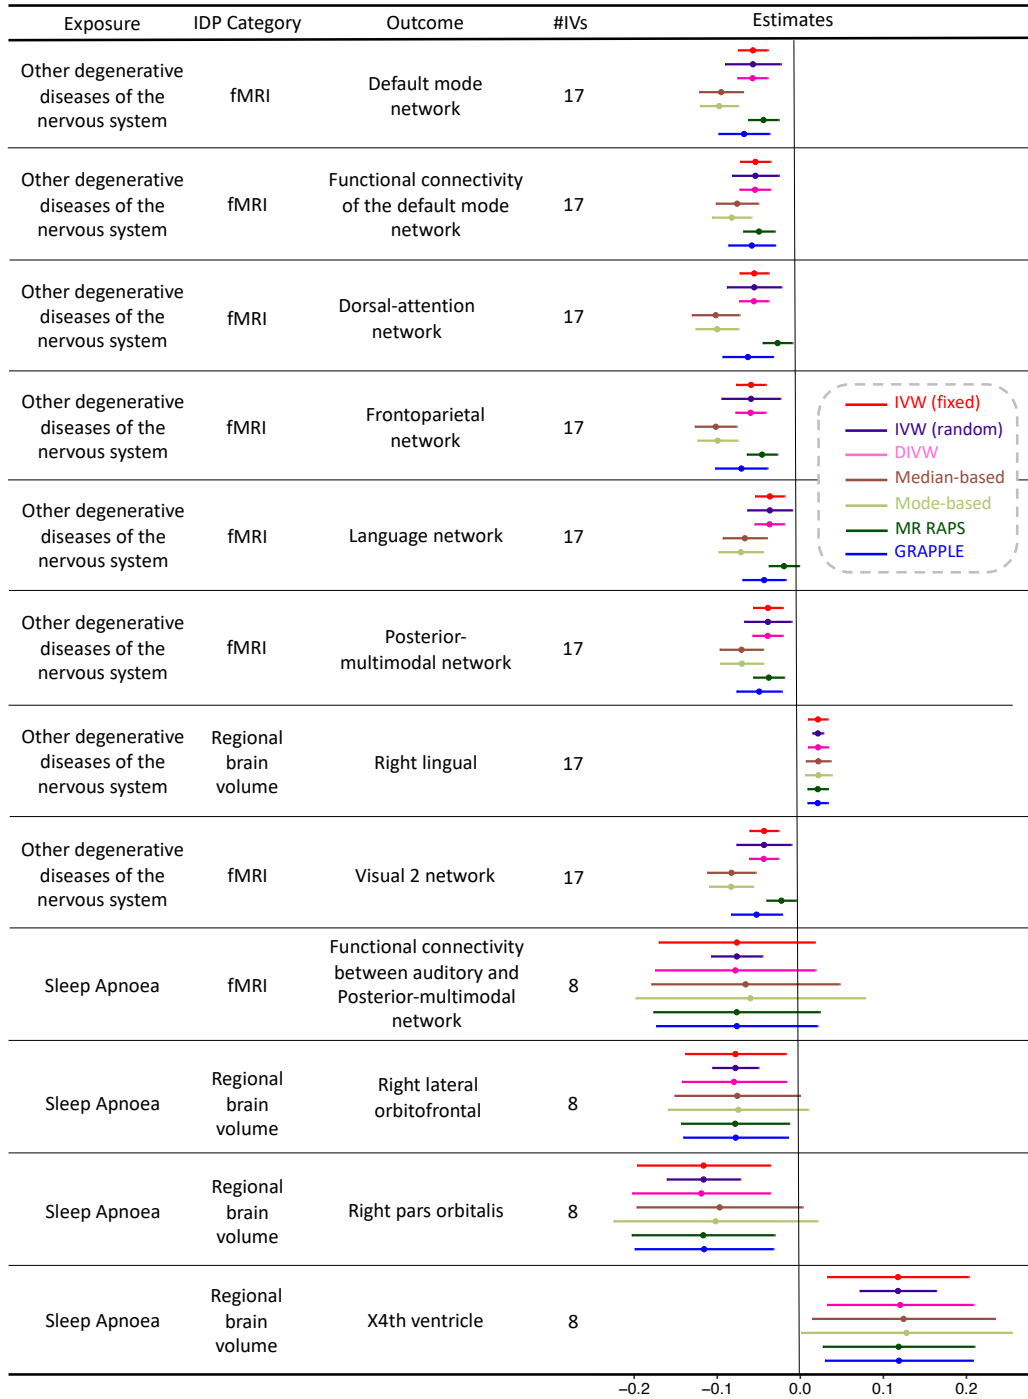

**Fig. S9 Genetic causal effects of other diseases of neurological system on brain imaging biomarkers.** We illustrated selected significant ( $P < 5.18 \times 10^{-6}$ ) causal genetic links from other diseases of neurological system (Exposure) to brain imaging biomarkers (Outcome) after adjusting for multiple testing using the Bonferroni procedure. IDP Category, category of brain imaging biomarkers; #IVs, the number of genetic variants used as instrumental variables. Different MR methods and their regression coefficients are labeled with different colors. See **Table S1** for the data resource of diseases and **Table S2** for data resources of imaging biomarkers.

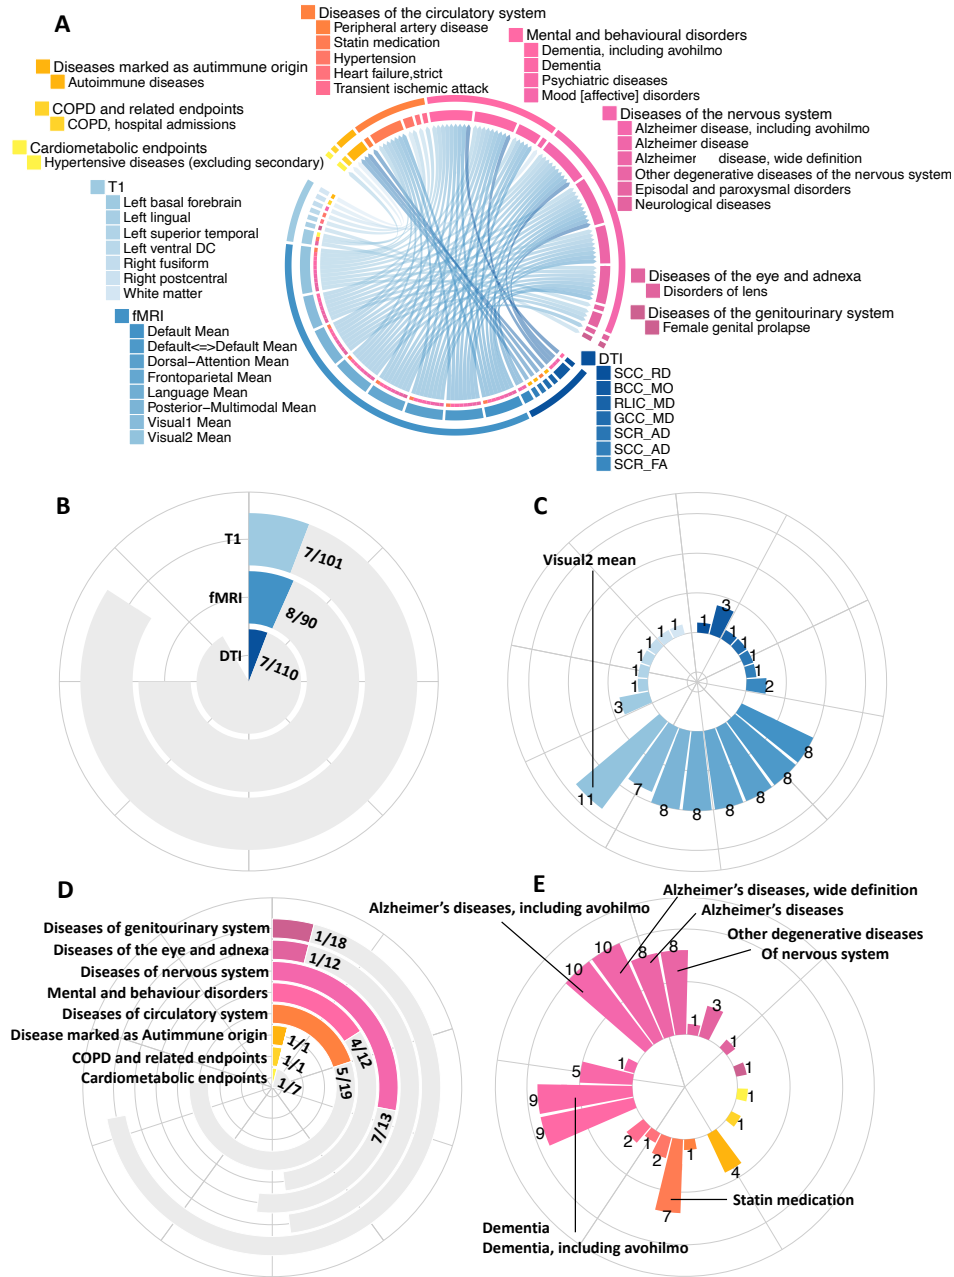

**Fig. S10 Mendelian Randomization with brain imaging traits being exposure and clinical endpoints being outcomes. (A)** The causal effect of brain deformation on clinical outcomes. The chord plot displays the connection between each causal pair. The first level (out) circle indicates each disease category or brain modality. The second level (middle) circle indicates the specific diseases within each disease category or fMRI/regional brain volume/DTI parameters within each brain modality. The third level circle on the clinical endpoints side indicates which diseases the brain feature links to. The abbreviations in the legend can be found in **Table S1**. **(B)(D)** The circle bar plot showed the number of unique brain imaging traits and clinical outcomes that were significant in the results by category. **(C)(E)** The circle bar plot showed the frequency of each brain imaging trait and disease by category. The legend color can be found in **(A)**.

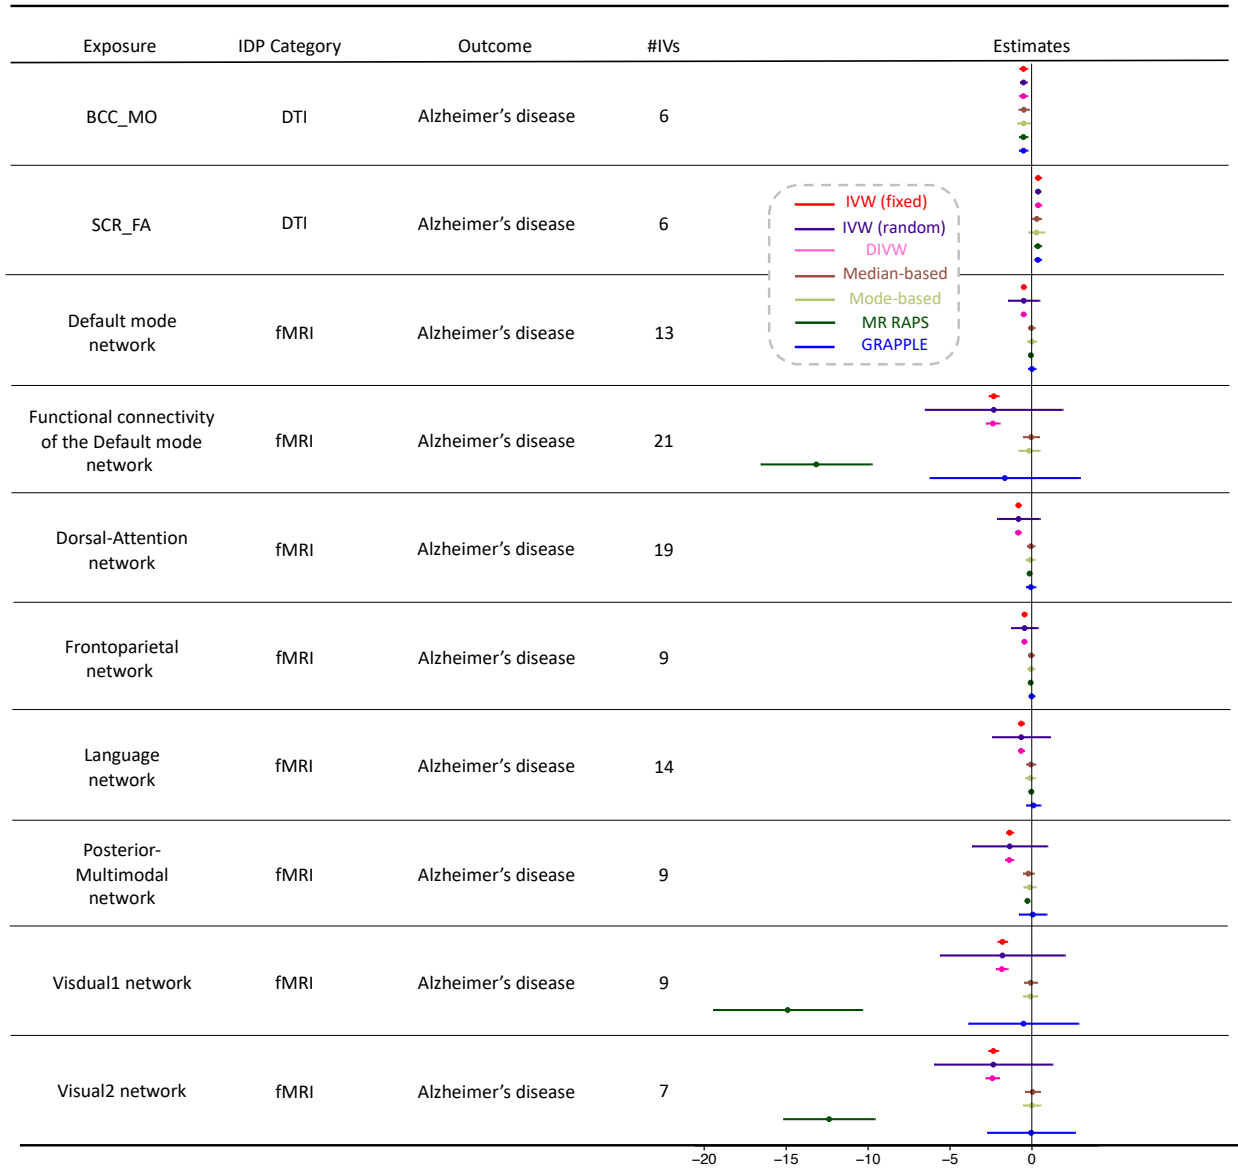

**Fig. S11 Genetic causal effects of brain imaging biomarkers to Alzheimer's disease.** We illustrated selected significant ( $P < 5.18 \times 10^{-6}$ ) causal genetic links from brain imaging biomarkers to (Exposure) to Alzheimer's disease (Outcome) after adjusting for multiple testing using the Bonferroni procedure. IDP Category, category of brain imaging biomarkers; #IVs, the number of genetic variants used as instrumental variables. Different MR methods and their regression coefficients are labeled with different colors. See **Table S1** for the data resource of Alzheimer's disease and **Table S2** for data resources of imaging biomarkers.

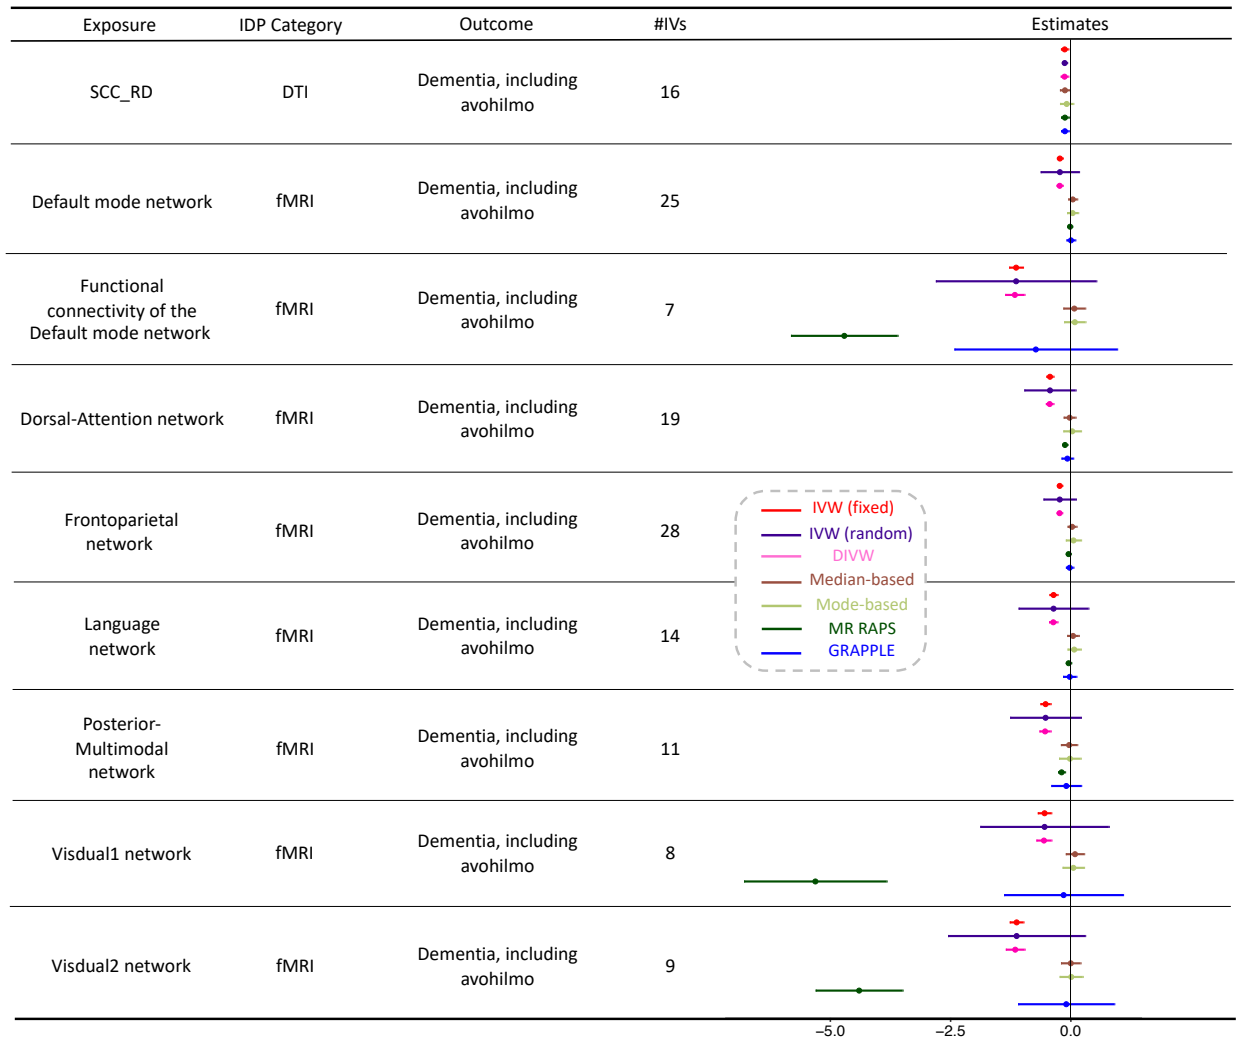

**Fig. S12 Genetic causal effects of brain imaging biomarkers to dementia.** We illustrated selected significant ( $P < 5.18 \times 10^{-6}$ ) causal genetic links from brain imaging traits to (Exposure) to dementia (Outcome) after adjusting for multiple testing using the Bonferroni procedure. IDP Category, category of brain imaging biomarkers; #IVs, the number of genetic variants used as instrumental variables. Different MR methods and their regression coefficients are labeled with different colors. See **Table S1** for the data resource of dementia and **Table S2** for data resources of imaging biomarkers.

5

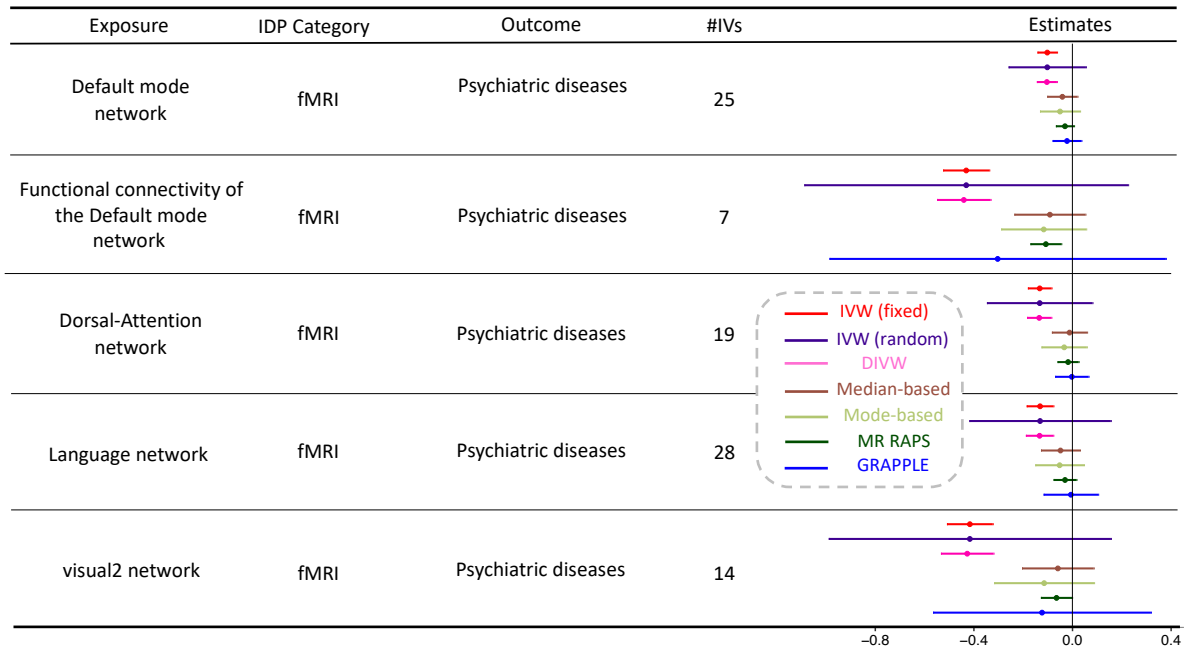

**Fig. S13 Genetic causal effects of brain imaging biomarkers to psychiatric diseases.** We illustrated selected significant ( $P < 5.18 \times 10^{-6}$ ) causal genetic links from brain imaging traits to (Exposure) to psychiatric diseases (Outcome) after adjusting for multiple testing using the Bonferroni procedure. IDP Category, category of brain imaging biomarkers; #IVs, the number of genetic variants used as instrumental variables. Different MR methods and their regression coefficients are labeled with different colors. See **Table S1** for the data resource of psychiatric diseases and **Table S2** for data resources of imaging biomarkers.

5

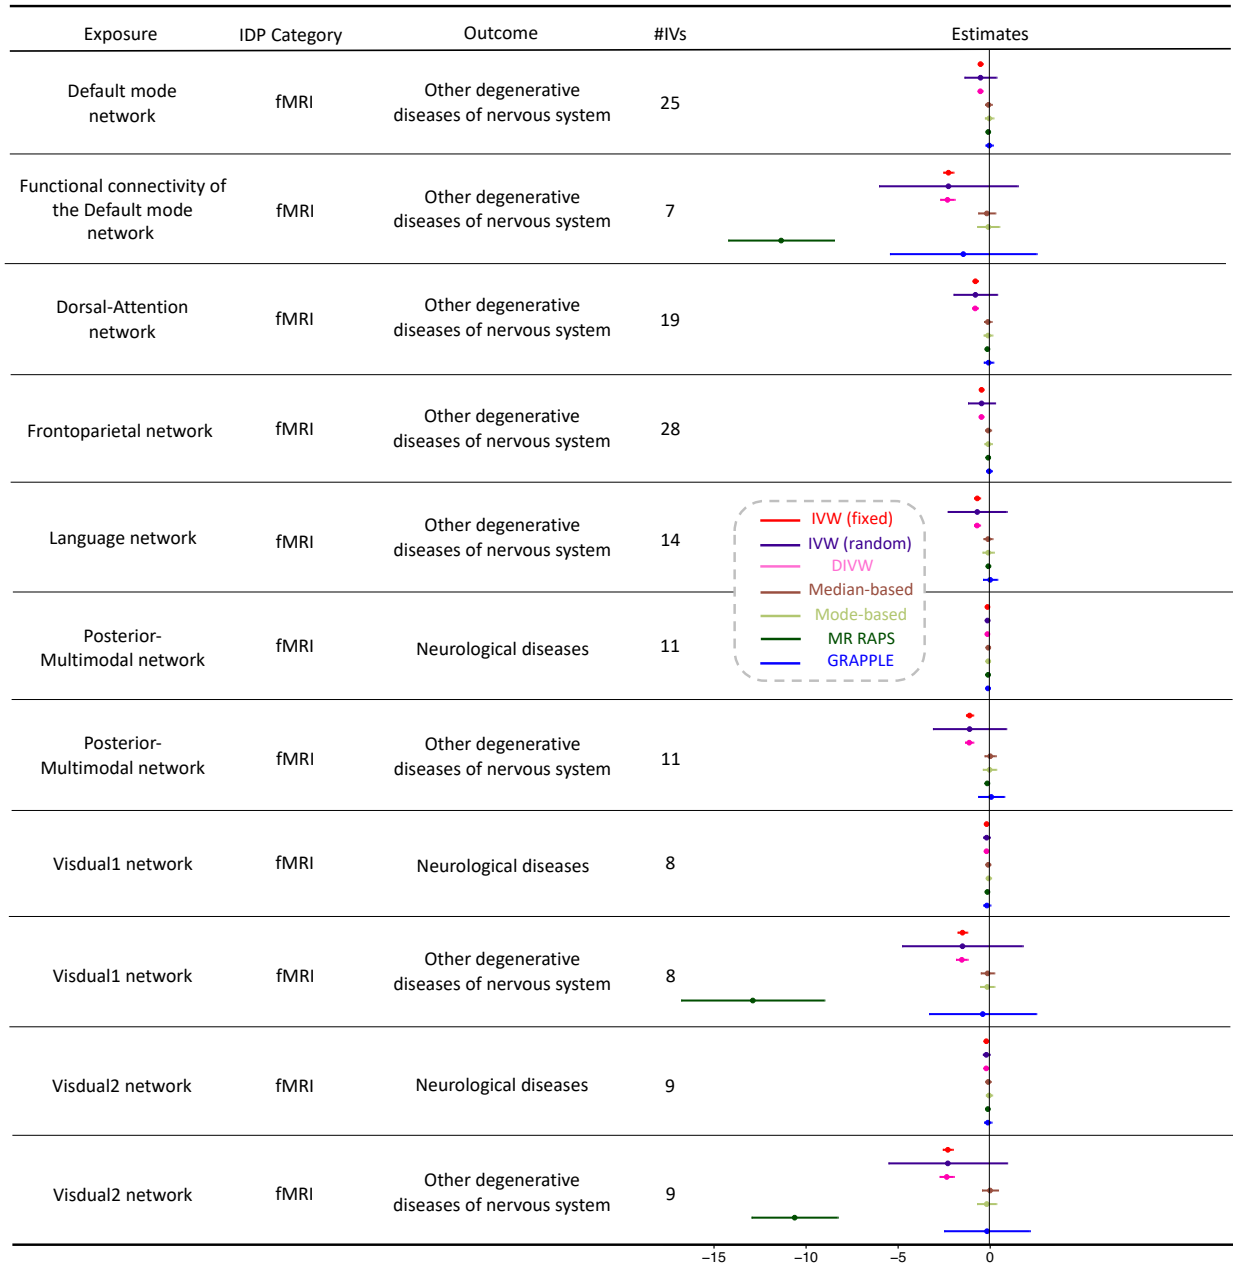

**Fig. S14 Genetic causal effects of brain imaging biomarkers to diseases of neurological systems.** We illustrated selected significant ( $P < 5.18 \times 10^{-6}$ ) causal genetic links from brain imaging biomarkers to (Exposure) to diseases of neurological system (Outcome) after adjusting for multiple testing using the Bonferroni procedure. IDP Category, category of brain imaging biomarkers; #IVs, the number of genetic variants used as instrumental variables. Different MR methods and their regression coefficients are labeled with different colors. See **Table S1** for the data resource of diseases and **Table S2** for data resources of imaging biomarkers.

5

10



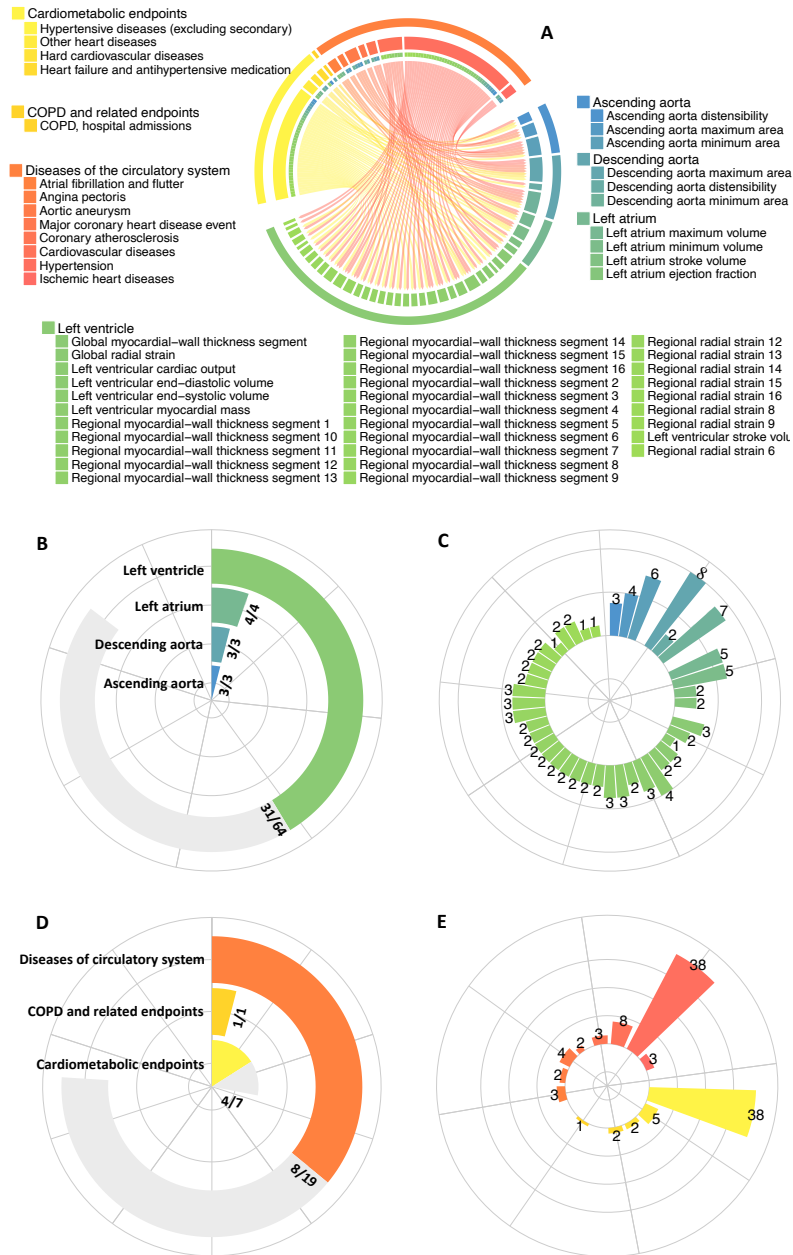

**Fig. 15 Mendelian Randomization with clinical endpoints being the exposure and heart imaging traits being the outcome. (A)** The causal effect of clinical outcomes on heart deformation under Bonferroni adjustment ( $P < 6.85 \times 10^{-6}$ ). The chord diagram displays the connection between each causal pair. The first level (out) circle indicates each disease category or heart chamber. The second level (middle) circle indicates the specific diseases within each disease category or heart imaging traits within each heart chamber. The third level circle on the disease's side indicates which heart features the diseases link to. The abbreviations in the legend can be found in **Table S1. (B)(D)** The circle bar plot showed the number of unique heart imaging traits and clinical outcomes that were significant in the results by category. **(C)(E)** The circle bar plot showed the frequency of each heart imaging trait and disease by category. The legend color can be found in **(A)**.

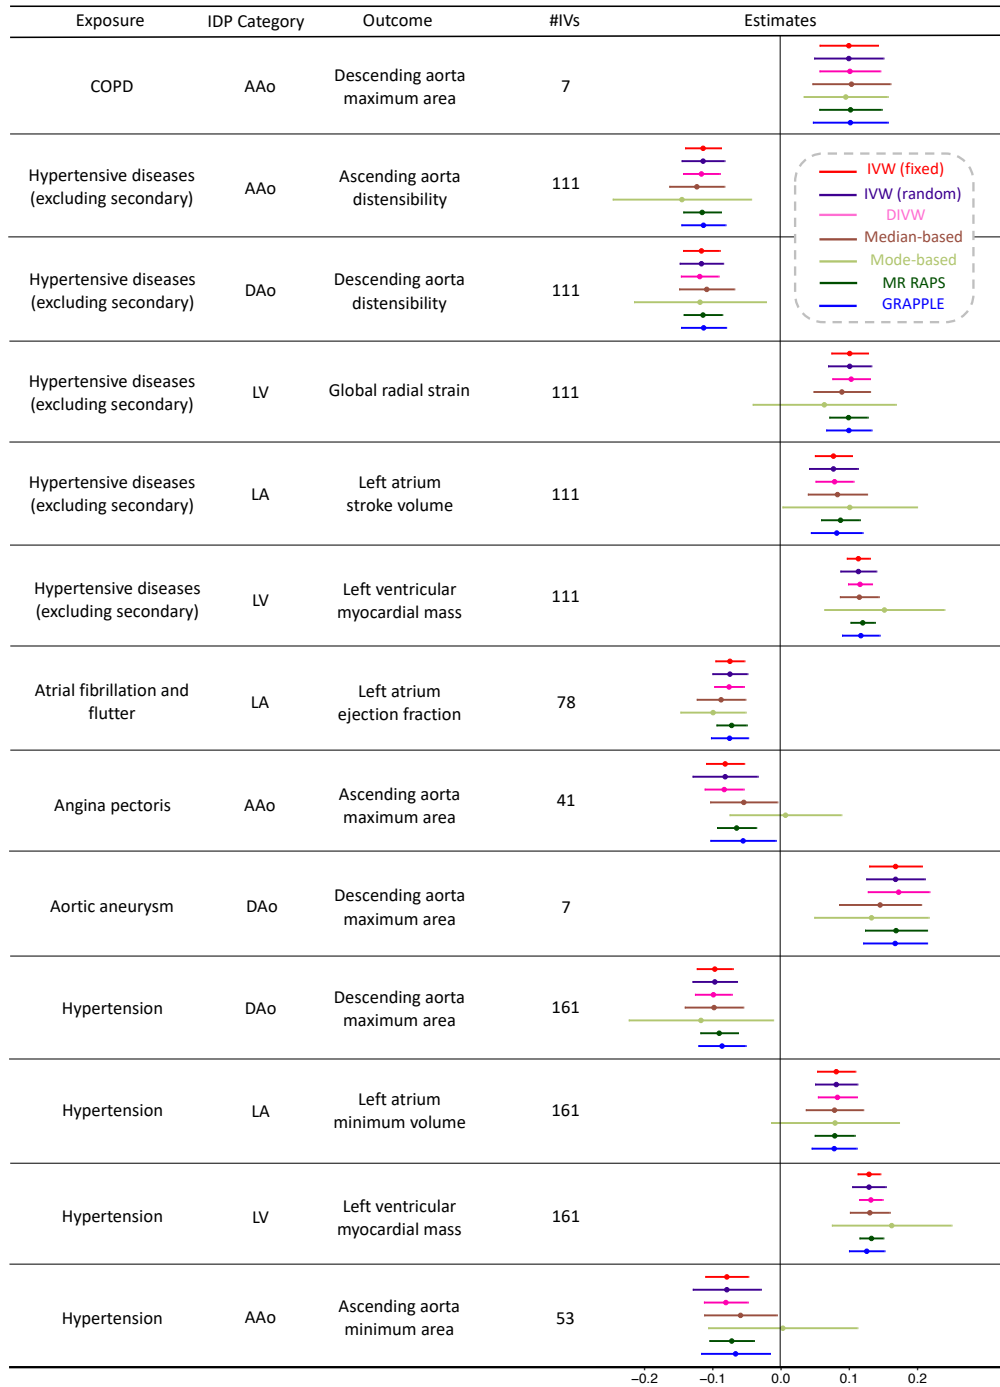

**Fig. S16 Genetic causal effects of clinical endpoints to heart imaging biomarkers.** We illustrated selected significant ( $P < 6.85 \times 10^{-6}$ ) causal genetic links from clinical endpoints (Exposure) to heart imaging traits (Outcome) after adjusting for multiple testing using the Bonferroni procedure. IDP Category, category of imaging biomarkers; #IVs, the number of genetic variants used as instrumental variables. Different MR methods and their regression coefficients are labeled with different colors. See **Table S1** for the data resource of clinical endpoints and **Table S2** for data resources of imaging biomarkers.



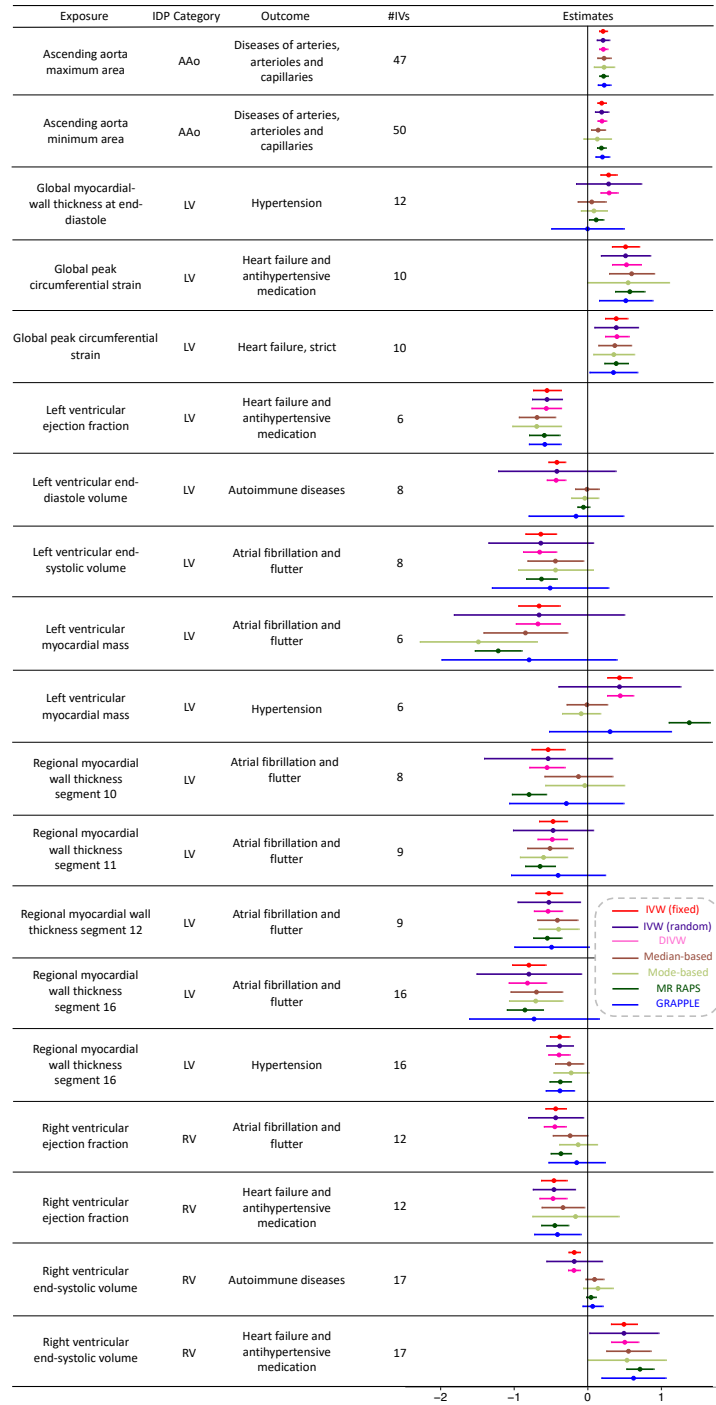

**Fig. S18 Genetic causal effects of heart imaging biomarkers on heart-related diseases.** We illustrated selected significant ( $P < 6.85 \times 10^{-6}$ ) causal genetic links from heart imaging biomarkers to (Exposure) to clinical endpoints (Outcome) after adjusting for multiple testing using the Bonferroni procedure. IDP Category, category of imaging biomarkers; #IVs, the number of genetic variants used as instrumental variables. Different MR methods and their regression coefficients are labeled with different colors. See **Table S1** for the data resource of clinical endpoints and **Table S2** for data resources of imaging biomarkers.



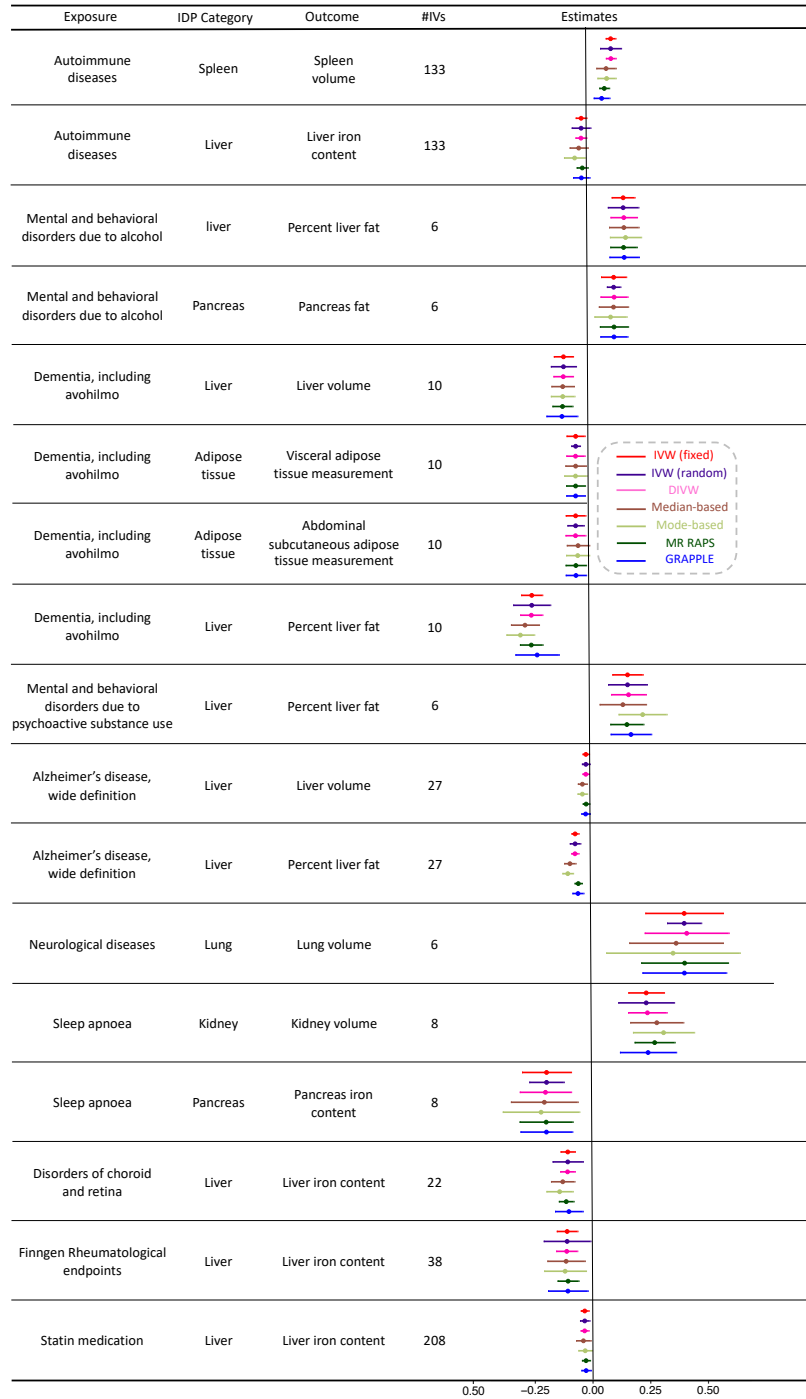

**Fig. S20 Genetic causal effects of clinical endpoints on abdominal imaging biomarkers.** We illustrated selected significant ( $P < 6.69 \times 10^{-5}$ ) causal genetic links from clinical endpoints to (Exposure) to abdominal imaging biomarkers (Outcome) after adjusting for multiple testing using the Bonferroni procedure. IDP Category, category of imaging biomarkers; #IVs, the number of genetic variants used as instrumental variables. Different MR methods and their regression coefficients are labeled with different colors. See **Table S1** for the data resource of clinical endpoints and **Table S2** for data resources of imaging biomarkers.

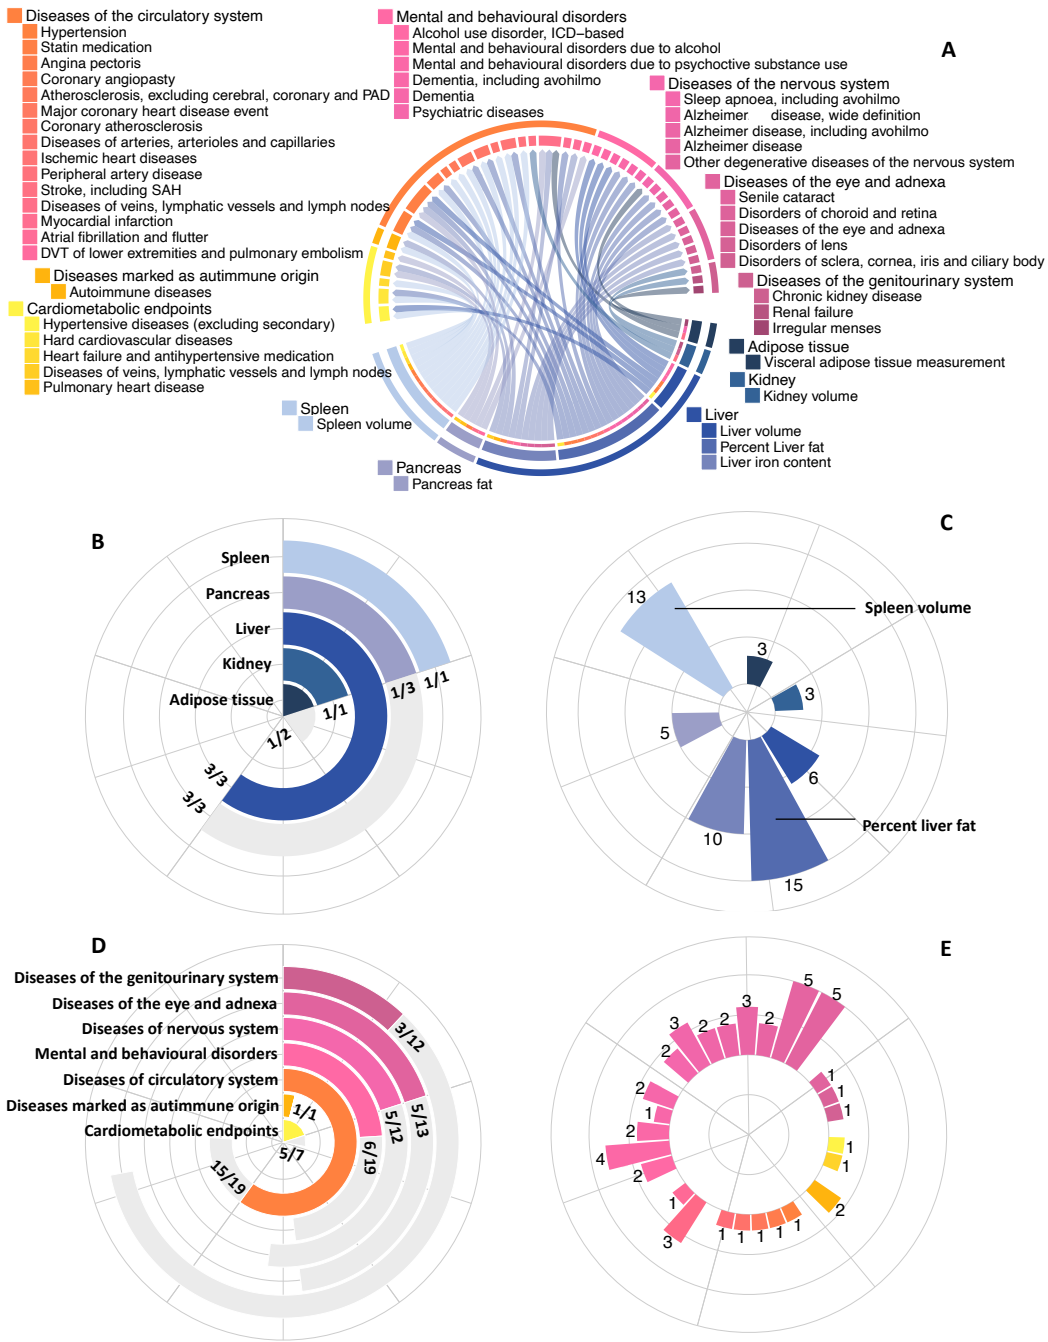

**Fig. 21 Mendelian Randomization with abdominal imaging traits being the exposure and clinical endpoints being the outcome. (A)** The causal effect of abdominal traits on clinical outcomes. The chord diagram displays the connection between each causal pair. The first level (out) circle indicates each disease category or heart chamber. The second level (middle) circle indicates the specific diseases within each disease category or abdominal imaging traits. The third level circle on the diseases feature side indicates which diseases the abdominal feature links to. **(B)(D)** The circle bar plot showed the number of unique abdominal imaging traits and clinical outcomes that were significant in the results by category. **(C)(E)** The circle bar plot showed the frequency of each abdominal imaging trait and disease by category. The legend color can be found in **(A)**.

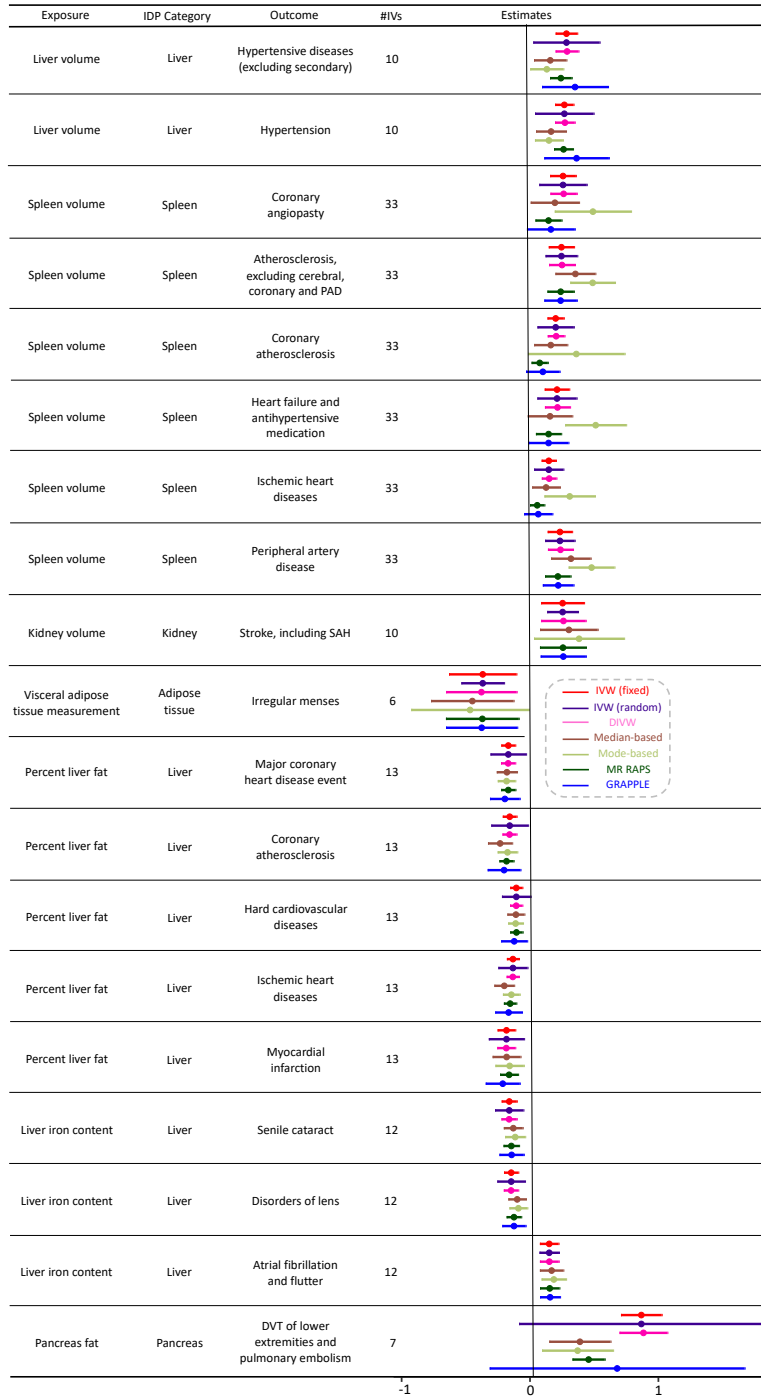

**Fig. S22 Genetic causal effects of abdominal imaging biomarkers on clinical endpoints.** We illustrated selected significant ( $P < 6.69 \times 10^{-5}$ ) causal genetic links from abdominal imaging biomarkers (Exposure) to clinical endpoints (Outcome) after adjusting for multiple testing using the Bonferroni procedure. IDP Category, category of imaging biomarkers; #IVs, the number of genetic variants used as instrumental variables. Different MR methods and their regression coefficients are labeled with different colors. See **Table S1** for the data resource of clinical endpoints and **Table S2** for data resources of imaging biomarkers.



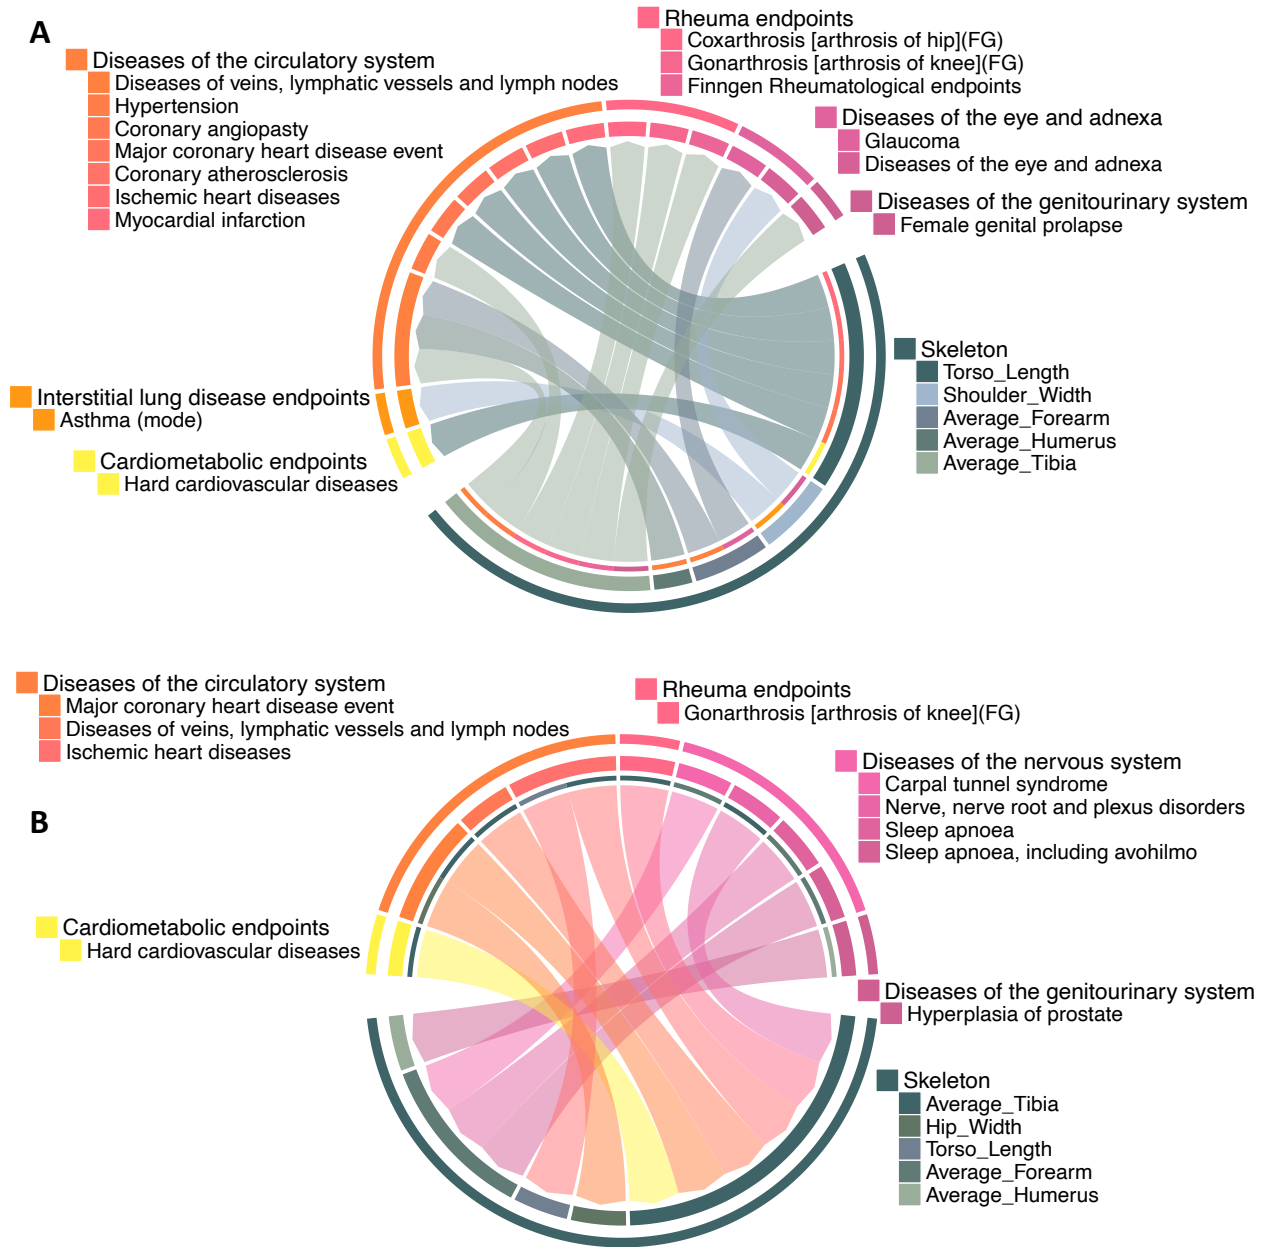

**Fig. 23 Mendelian Randomization results between the skeleton and clinical endpoints.**

**(A)** The causal effect of clinical outcomes on abdominal traits. The chord diagram displays the connection between each causal pair. The first level (out) circle indicates each disease category or skeleton. The second level (middle) circle indicates the specific diseases within each disease category or skeleton DXA traits. The third level circle on the imaging traits side indicates which diseases the skeleton feature links to. **(B)** The causal effect of abdominal traits on clinical outcomes. The chord diagram displays the connection between each causal pair. The first level (out) circle indicates each disease category or skeleton. The second level (middle) circle indicates the specific diseases within each disease category or skeleton DXA traits. The third level circle on the imaging traits side indicates which diseases the skeleton feature links to.

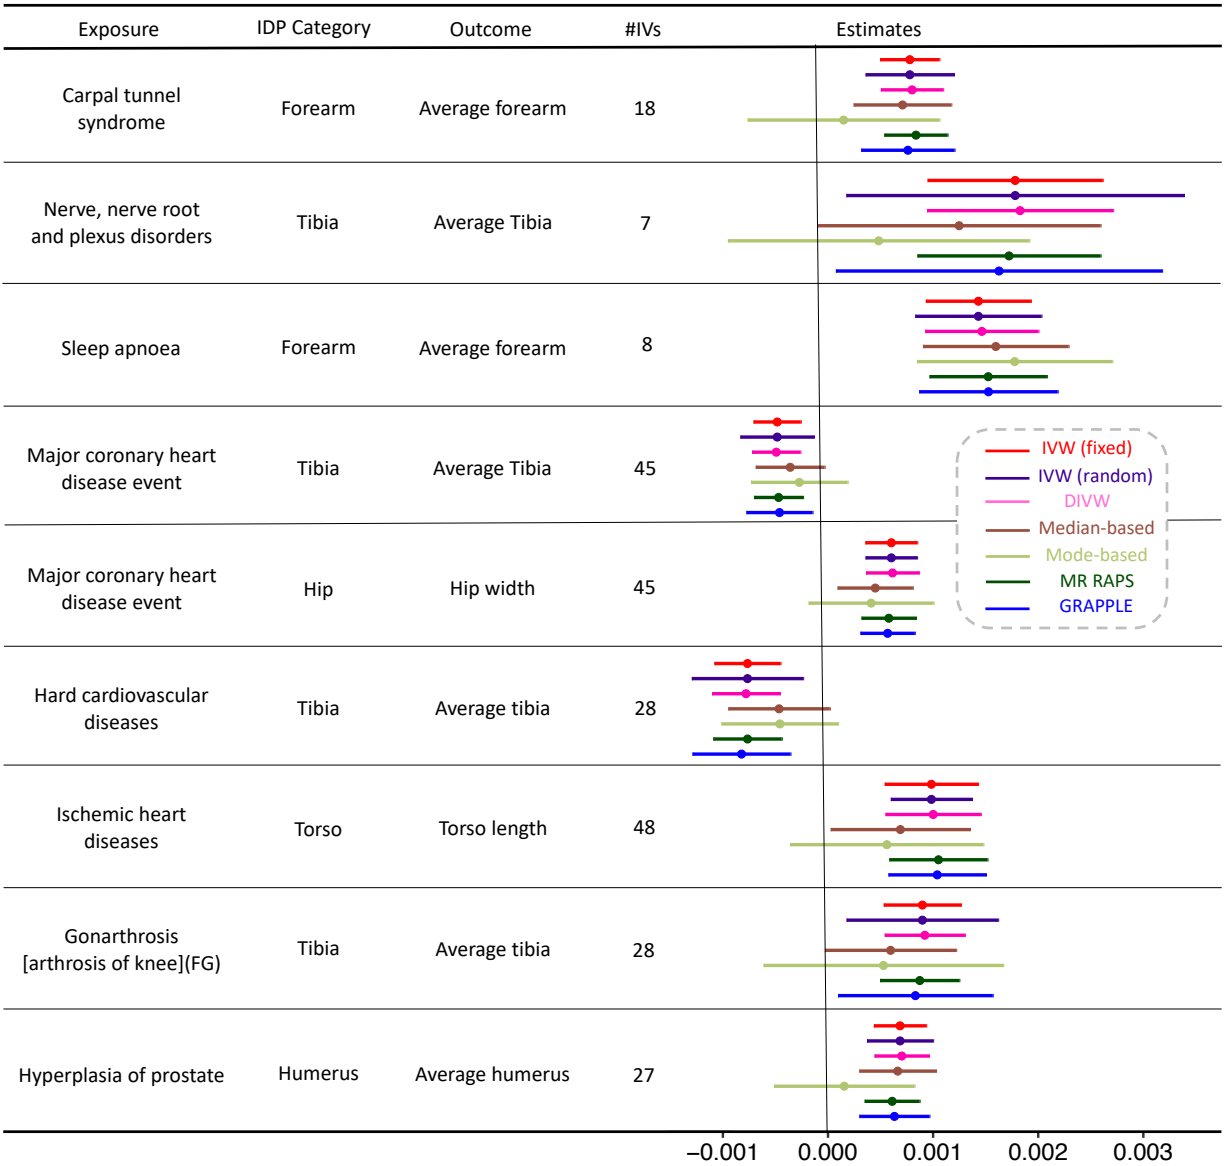

**Fig. S24 Genetic causal effects of clinical endpoints on skeleton imaging biomarkers.** We illustrated selected significant ( $P < 3.39 \times 10^{-5}$ ) causal genetic links from clinical endpoints to (Exposure) to skeleton imaging biomarkers (Outcome) after adjusting for multiple testing using the Bonferroni procedure. IDP Category, category of imaging biomarkers; #IVs, the number of genetic variants used as instrumental variables. Different MR methods and their regression coefficients are labeled with different colors. See **Table S1** for the data resource of clinical endpoints and **Table S2** for data resources of imaging biomarkers.

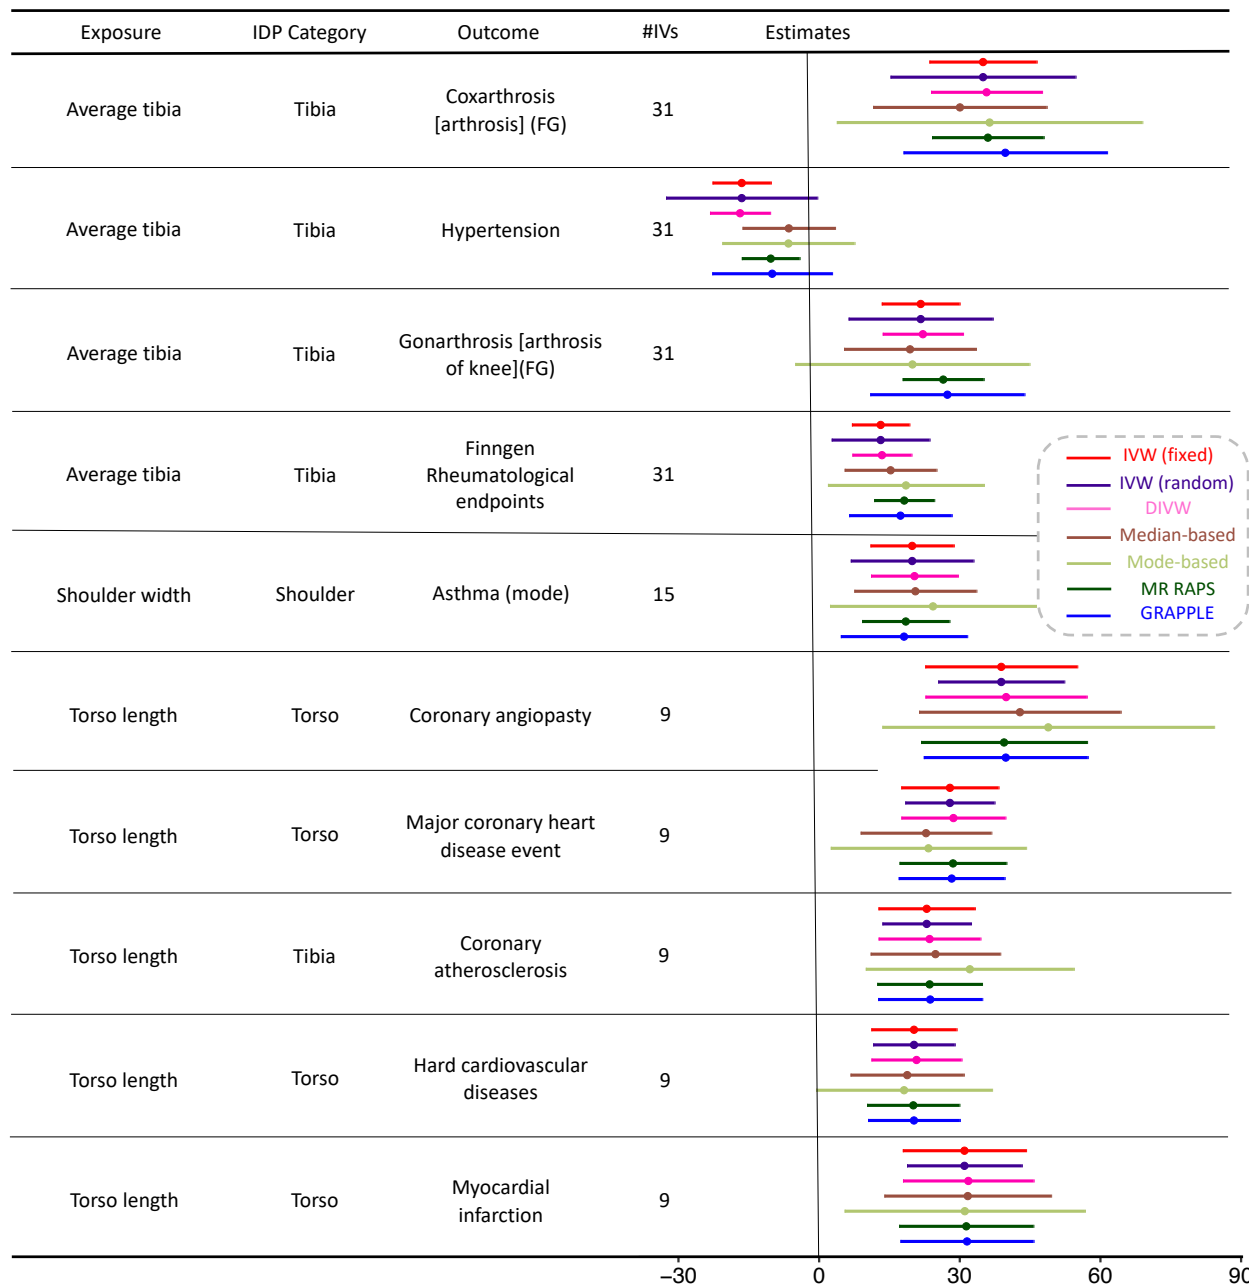

**Fig. S25 Genetic causal effects of abdominal imaging biomarkers on clinical endpoints.** We illustrated selected significant ( $P < 3.39 \times 10^{-5}$ ) causal genetic links from skeleton imaging biomarkers (Exposure) to clinical endpoints (Outcome) after adjusting for multiple testing using the Bonferroni procedure. IDP Category, category of imaging biomarkers; #IVs, the number of genetic variants used as instrumental variables. Different MR methods and their regression coefficients are labeled with different colors. See **Table S1** for the data resource of clinical endpoints and **Table S2** for data resources of imaging biomarkers.

5

10

**Legends for Tables S1 to S6 (All tables can be found in a zip file).**

**Table S1. ID of Finngen clinical endpoints used in the study.**

**Table S2. ID of imaging biomarkers used in the study.**

5

**Table S3. Estimates of causal genetic links between brain imaging biomarkers and clinical endpoints.**

**Table S4. Estimates of causal genetic links between heart imaging biomarkers and clinical endpoints.**

**Table S5. Estimates of causal genetic links between abdominal imaging biomarkers and clinical endpoints.**

10

**Table S6. Estimates of causal genetic links between skeleton imaging biomarkers and clinical endpoints.**
